# Machine learning analysis of the bleomycin-mouse model reveals the spatial and temporal pulmonary inflammatory fingerprint

Natalie Bordag<sup>1</sup>, Valentina Biasin<sup>1,2</sup>, Diana Schnoegl<sup>1</sup>, Valzano Francesco<sup>1</sup>, Katharina Jandl<sup>1,3</sup>, Bence M. Nagy<sup>1</sup>, Neha Sharma<sup>1,4</sup>, Malgorzata Wygrecka<sup>5</sup>, Grazyna Kwapiszewska<sup>1,3</sup>, Leigh M. Marsh<sup>1\*</sup>

## Affiliations

<sup>1</sup>Ludwig Boltzmann Institute for Lung Vascular Research, Graz, Austria.

<sup>2</sup>Division of Endocrinology and Diabetology, Department of Internal Medicine, Medical University of Graz, Graz.

<sup>3</sup>Otto Loewi Research Center, Medical University of Graz, Graz, Austria.

<sup>4</sup>Division of Pulmonology, Department of Internal Medicine, Medical University of Graz, Graz, Austria.

<sup>5</sup>Department of Biochemistry, Universities of Giessen and Marburg Lung Center, Giessen, Germany. Member of German Center for Lung Research.

\*to whom correspondence should be addressed:

Dr. Leigh Marsh

Leader of the Translational Platform

Ludwig Boltzmann Institute Lung Vascular Research

Center for Medical Research

Neue Stiftingtalstraße 6/VI

8010 Graz, AUSTRIA

[Leigh.Marsh@lvr.lbg.ac.at](mailto:Leigh.Marsh@lvr.lbg.ac.at)

## One Sentence Summary

Unbiased immunophenotyping and data modelling exposed the dynamic shifts in immune cell composition during bleomycin induced pulmonary fibrosis.

## 30 **Abstract**

31 The bleomycin mouse model is the most extensively used animal model to study pulmonary fibrosis.  
32 Despite this, the inflammatory cell kinetics and cell compartmentalisation is still incompletely  
33 understood. Here we simultaneously analysed 16 inflammatory cell populations in 303 samples and  
34 applied advanced data modelling to conclusively detail these kinetics.

35 Three days post-bleomycin, the inflammatory profile was typified by acute innate inflammation,  
36 pronounced neutrophilia and loss of alveolar macrophages. After 14 days, rapid responders were  
37 increasingly replaced by the adaptive immune system and monocyte-derived alveolar macrophages,  
38 which progressed till 21 days. Multi-colour imaging revealed the spatial-temporal cell distribution and  
39 the close association of T-cells with fibrotic lung tissue at later time-points.

40 Unbiased immunophenotyping and data modelling exposed the dynamic shifts in immune cell  
41 composition distinct for each phase of fibrosis process and defined the transition from innate to adaptive  
42 immunity marking initial lung parenchyma remodelling.

43

## 44 **Keywords**

45 Bleomycin, mouse, inflammatory cells, machine learning, pulmonary fibrosis

46

## 47 **Abbreviations**

48 BALF, bronchoalveolar lavage fluid; BH, Benjamini-Hochberg; FCM, flow cytometry; IPF,  
49 idiopathic pulmonary fibrosis;  $\text{LOG}_{x+1}$ , logarithm to the basis 10 of (x+1); ML, maximum likelihood;  
50 MVA, multivariate analysis; NLME, non-linear mixed models; OPLS-DA, orthogonal projections to  
51 latent structures discriminant analysis; PCA, principal component analysis; PF, pulmonary fibrosis;  
52 UMAP, Uniform Manifold Approximation and Projection; UVA, univariate analysis; 4RT, fourth  
53 root.

## 54 **Introduction**

55 Animal models of human disease are an invaluable tool to decipher disease relevant pathomechanisms,  
56 to discover therapeutic targets and to drive translation into clinical practice. To date, the mouse  
57 bleomycin-induced lung injury model is the most frequently used animal model to investigate  
58 pulmonary fibrosis (B Moore et al., 2013; Della Latta et al., 2015; Tashiro et al., 2017). Similar to the  
59 human situation, in mice bleomycin exposure is characterized by epithelial damage, inflammatory cell  
60 infiltration, and expansion of fibroblasts and myofibroblasts as well as ECM deposition (Biasin et al.,  
61 2020, 2017; El Agha et al., 2017; Tashiro et al., 2017; Xie et al., 2018). Although, the bleomycin model  
62 does not completely recapitulate human idiopathic pulmonary fibrosis (IPF), it still remains the most  
63 common and important animal model to study this disease.

64 IPF is a severe, rapidly progressing interstitial lung disease with high mortality rates and short median  
65 survival of 1.5 - 4 years (Marshall et al., 2018; Wuyts et al., 2013). IPF is characterized by extensive  
66 lung tissue scarring, limited inflammation and extracellular matrix remodelling (Meltzer and Noble,  
67 2008). Current treatment options slow the loss of lung function, but are unable to halt or reverse disease  
68 progression (Maher and Strek, 2019). Accordingly, there is an urgent unmet clinical need for novel  
69 therapies for IPF patients. To date the aetiology and pathogenesis of IPF is still insufficiently  
70 understood; however, the role of inflammation remains undeniable yet controversial. The older concept  
71 that IPF is an inflammatory driven process has been gradually replaced by the theory of recurrent injury  
72 and aberrant repair (Selman et al., 2001; Selman and Pardo, 2002; Wuyts et al., 2013). However,  
73 multiple inflammatory cells have been implicated in disease pathogenesis, including macrophages  
74 (Misharin et al., 2017; Reyfman et al., 2019) and T cells (Todd et al., 2013), which are connected with  
75 poorer prognosis (Balestro et al., 2016).

76 In the bleomycin model, the early phase post bleomycin administration is characterised by acute lung  
77 injury and inflammation, which is observed to last between 1-7 days (Peng et al., 2013). This  
78 inflammatory phase is followed by active fibrosis, between 7-14 days and late fibrosis between, 21-28  
79 days (Della Latta et al., 2015; Izbicki et al., 2002; Peng et al., 2013; Tashiro et al., 2017). As most  
80 studies have only analysed specific cell populations or time points, a comprehensive description of the  
81 inflammatory cell kinetics is still missing. For the detection and quantification of inflammatory cells,  
82 flow cytometry (FCM) is the method of choice. FCM is able to differentiate and quantify immune cell  
83 populations in unprecedented detail, not only from the circulation but also from disease relevant tissue  
84 (Marsh et al., 2018; Misharin et al., 2017; Tighe et al., 2019a). In contrast to traditional  
85 immunofluorescent staining, which generally use 1-3 markers for cell identification, flow cytometers  
86 applies multiple markers to simultaneously quantify numerous cell populations at a single cell  
87 resolution. Thus, FCM generates large quantities of complex data, where the analysis, visualization and

88 interpretation of which requires sophisticated analysis techniques, such as computational flow  
89 cytometry (Saeys et al., 2016).

90 In order to conclusively detail the inflammatory cell kinetics in the bleomycin model, we here  
91 assembled historical FCM data from 15 different experiments and applied advanced data modelling,  
92 including univariate, multivariate and machine learning methods. We show how the combination of  
93 advanced data modelling and in-depth immune profiling can detail the dramatic changes in the  
94 inflammatory landscape in this model and also serves as a reference point.

## 95 Results

### 96 Pre-processing of flow cytometric data substantially improves statistical analysis performance

97 Intra-tracheal administration of bleomycin in mice, results in a time-dependent development of fibrosis  
 98 (Figure 1AB). To comprehensively describe the inflammatory cell kinetics following bleomycin  
 99 treatment, we assembled and conjointly analysed historical FCM data from 15 independent  
 100 experiments, this resulted in 159 BALF and 144 lung tissue samples (Supplementary Table S1). Using  
 101 standard gating strategies, a total of 16 cell populations covering the main myeloid and lymphoid cell  
 102 types (Table 1) were identified (Figure 1C). The aggregation of historical experiments inherently led to  
 103 an unbalanced experimental design (Supplementary Table S1), which was handled by robust statistical  
 104 methods<sup>[Box 1]</sup>.

105 **Table 1. Inflammatory cell identification and corresponding markers.**

| Panel    | Cell type    | Abbrievation              | Cell population                    | Panel I |      |         |       |      |      |      | Panel II |       |     |     |     |      |       |
|----------|--------------|---------------------------|------------------------------------|---------|------|---------|-------|------|------|------|----------|-------|-----|-----|-----|------|-------|
|          |              |                           |                                    | SSC     | CD45 | SiglecF | CD11c | Gr-1 | CD64 | CD24 | MHC-II   | CD11b | CD3 | CD4 | CD8 | CD19 | gdTCR |
|          | Cell count   |                           | CD45 <sup>+</sup> live cell        |         | +    |         |       |      |      |      |          |       |     |     |     |      |       |
| Myeloid  | Macrophages  | AM                        | Alveolar macrophages               | hi      | +    | +       | +     |      | +    |      | +/-      |       |     |     |     |      |       |
|          |              | MoAM                      | Monocyte derived macrophages       |         | +    | lo      | +     |      | +    | -    | +        | +/-   |     |     |     |      |       |
|          |              | IM                        | Interstitial macrophages           |         | +    | -       | -     |      | +    | -    | +        | +/-   |     |     |     |      |       |
|          | DCs          | DC                        | CD11b <sup>+</sup> Dendritic cells |         | +    |         |       | -    | -    | +    | +        | +     |     |     |     |      |       |
|          | Monocytes    | Gr1 <sup>+</sup> MoMp     | Inflammatory monocytes             |         | +    |         |       |      | +    | +    |          | -     | +   |     |     |      |       |
|          |              | Gr1 <sup>-</sup> MoMp     | Constitutive monocytes             |         | +    |         |       |      | -    |      |          | -     | +   |     |     |      |       |
|          | Granulocytes | EOS                       | Eosinophils                        |         | hi   | +       | +     | -    |      |      |          | +     |     |     |     |      |       |
|          |              | PMN                       | Mature neutrophils                 |         | hi   | +       | +/-   | -    | +    |      |          | +     |     |     |     |      |       |
|          |              | SiglecF <sup>+</sup> PMN  | SiglecF <sup>+</sup> neutrophils   |         | hi   | +       | +     | -    | +    |      |          | +     |     |     |     |      |       |
|          |              | Immature PMN              | Immature neutrophils               |         | hi   | +       |       | -    | +    |      |          | -     | +   |     |     |      |       |
| Lymphoid | B cells      | CD19 <sup>+</sup> B cells | B cells                            |         | lo   | +       |       |      |      |      |          |       | -   |     |     | +    |       |
|          | T cells      | CD3 <sup>+</sup> T cells  | T cells                            |         | lo   | +       |       |      |      |      |          |       |     | +   |     |      | -     |
|          |              | CD4 <sup>+</sup> T cells  | T helper cells                     |         | lo   | +       |       |      |      |      |          |       |     | +   | +   | -    | -     |
|          |              | CD8 <sup>+</sup> T cells  | Cytotoxic T cells                  |         | lo   | +       |       |      |      |      |          |       |     | +   | -   | +    | -     |
|          |              | $\gamma\delta$ T cells    | $\gamma\delta$ T cells             |         | lo   | +       |       |      |      |      |          |       |     | +   | +   | -    | -     |

106

107

108

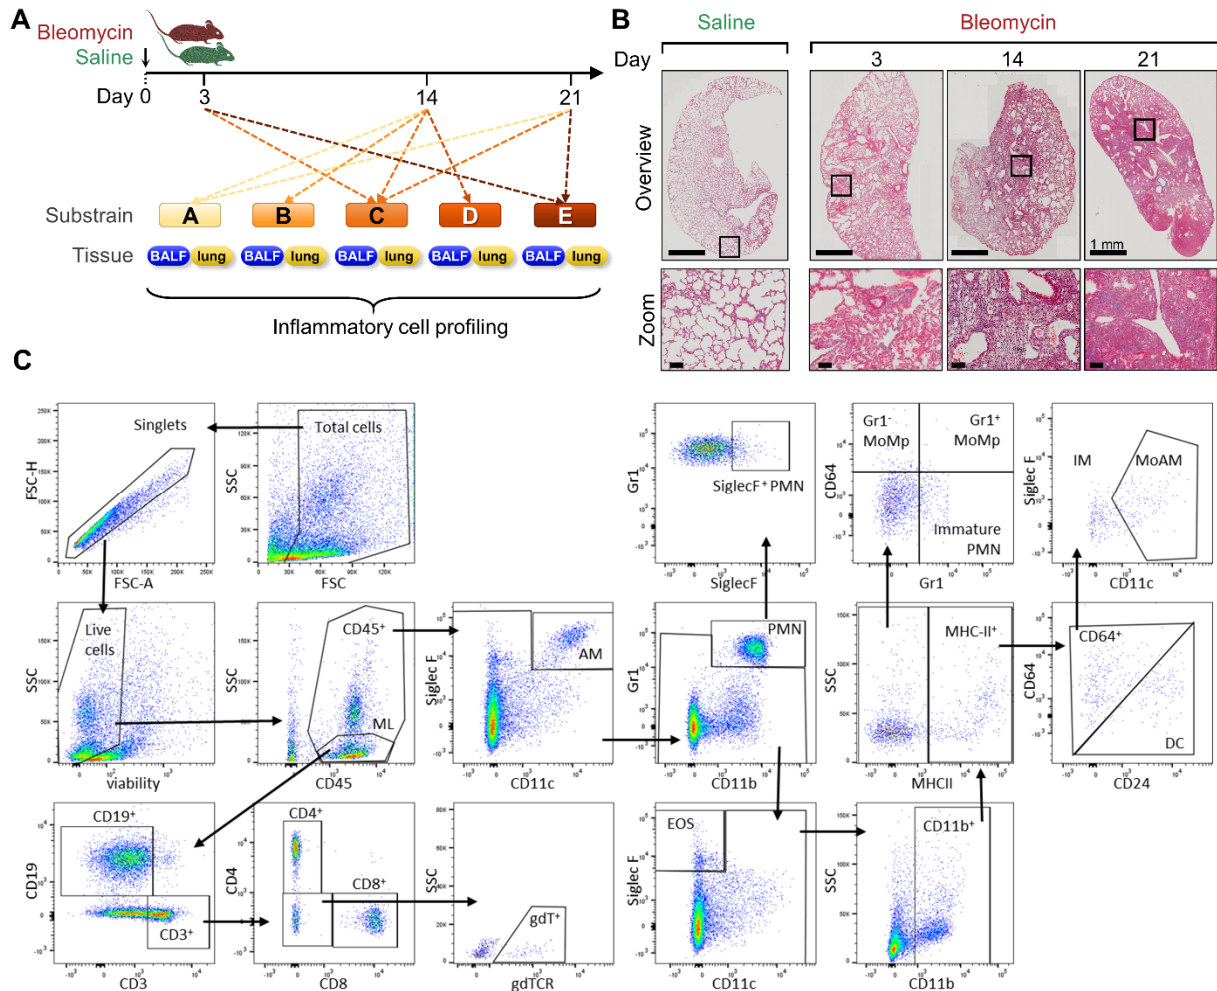

109

110 **Fig. 1.** Overview of study design, pathological changes and gating strategy. (A) Historical flow cytometry data from the  
 111 bleomycin mouse model were pooled and collectively analysed. Samples were collected 3, 14, or 21 days post  
 112 bleomycin or saline administration from the compartments BALF (159 samples) and lung tissue (144 samples). Five  
 113 different C57BL/6 substrains were included. (B) Representative Masson's trichrome staining of lung sections, showing  
 114 pathologic alterations in the bleomycin model. Zoomed images exemplify the increasing fibrosis accumulation from  
 115 day 3 to 21 after bleomycin challenge, scale bar represents 100  $\mu$ m. (C) Representative flow cytometry gating strategy.  
 116 Abbreviations see Table 1.

117 In both tissues the distribution of all 16 analysed cell populations was significantly non-normal with a  
 118 positive skew<sup>[Box 1]</sup> (Fig. 2A, Supplementary Fig. S1 and Supplementary Data 1). To improve  
 119 distribution we trialled several common transformations; square root, reciprocal, Freeman Tukey, logit,  
 120 LOG, LOG<sub>x+1</sub> and 4RT. Only LOG, LOG<sub>x+1</sub> and 4RT improved data distribution ( $p_{BH} > 0.05$ ,  
 121 Supplementary Data 1). As both LOG and LOG<sub>x+1</sub> gave virtually equivalent results, but as LOG<sub>x+1</sub> has  
 122 additionally the advantage of not introducing missing values for zero value counts, consequent analysis  
 123 was performed with only LOG<sub>x+1</sub> and 4RT (Fig. 2AB).

124

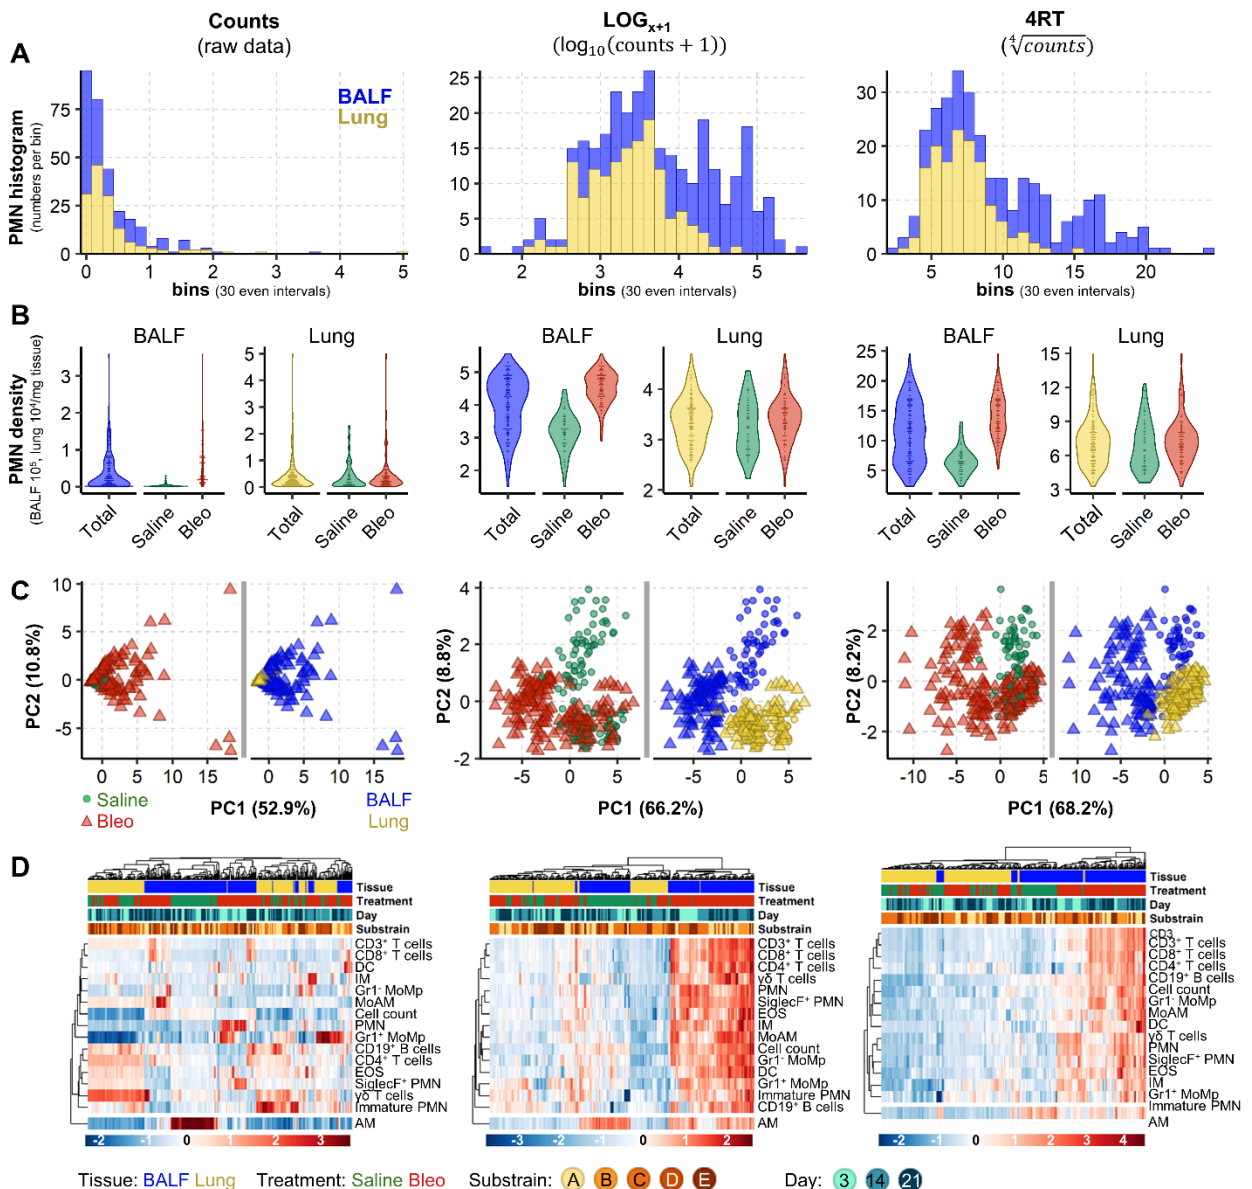

125  
126 **Fig. 2.** Data transformation improves data distribution and analytical power. Analysis of cell count data (untransformed) or  
127 following transformation using LOG<sub>x+1</sub> or 4RT (fourth root) using 159 BALF and 144 lung samples. Cell counts in  
128 BALF are 10<sup>5</sup> and in lung 10<sup>4</sup>/mg tissue. Examples of data distribution of neutrophils (PMN) as one representative  
129 population in BALF and lung samples by (A) Histograms and (B) Violin plots, total represents combined saline and  
130 bleomycin samples. (C) PCA scores plots with each point representing the inflammatory cell profile (16 populations)  
131 in one sample, plots are coloured to highlight different experimental conditions. In B and C, dots represent single  
132 sample values. (D) Heatmaps with hierarchical clustering of all 16 analysed cell populations.

### 133 Bleomycin drives strong changes in the inflammatory profile

134 To identify global changes in the inflammatory cell profile, we first applied unsupervised principal  
135 component analysis (PCA). This method reduces dimensionality by creating new variables, which  
136 successively maximize variance and thereby aids data interpretability. Without data transformation, the  
137 scores plot was dominated by single sample differences, which obscured any experimental effects (Fig.  
138 2C, left panel). After transformation pronounced differences in the inflammatory profile were revealed

139 (Fig. 2C). Both  $\text{LOG}_{x+1}$  and 4RT substantially improved the performance of the hierarchical clustering  
140 (HC), yielding clearer clustering and heatmap results (Fig. 2D). The highest influence on the  
141 inflammatory landscape was caused by the tissue compartment (BALF or lung), causing samples to  
142 separate along the first principal component (PC1). The second highest difference was caused by  
143 bleomycin, separating samples in the BALF along the second principal component (PC2; Fig. 2C,  
144 middle and right panels). Similarly, HC was first driven by the tissue compartment, followed by some  
145 weaker subclustering due to bleomycin treatment. The majority of cell populations increased after  
146 bleomycin exposure, while alveolar macrophages (AlvMp) decreased (Fig. 2D). We next utilised  
147 macroPCA, a robust PCA method able to handle and identify all possible types of data  
148 contaminations<sup>[Box 1]</sup>, including strong single value or sample outliers (Hubert et al., 2019). MacroPCA  
149 results were in good agreement with PCA (Supplementary Fig. S2A), which confirmed that this dataset  
150 is free of severe outliers allowing the use of a wide variety of statistical methods (Rousseeuw and  
151 Hubert, 2018).

152

---

### Box 1 | Glossary of analysis terms

---

|                            |                                                                                                                                                                                                                                                                                                                                                                                                                                                                                                                                                                                                                                                                                                                                                                                                                                                                                  |
|----------------------------|----------------------------------------------------------------------------------------------------------------------------------------------------------------------------------------------------------------------------------------------------------------------------------------------------------------------------------------------------------------------------------------------------------------------------------------------------------------------------------------------------------------------------------------------------------------------------------------------------------------------------------------------------------------------------------------------------------------------------------------------------------------------------------------------------------------------------------------------------------------------------------|
| <b>robustness</b>          | is a measure for how easily outlier values distort results, e.g. <ul style="list-style-type: none"><li>• average: not robust, a single strong outlier deforms results severely</li><li>• median: very robust, good results even with almost half of all values being strong outliers</li></ul>                                                                                                                                                                                                                                                                                                                                                                                                                                                                                                                                                                                   |
| <b>unbalanced</b>          | describes unequal group sizes or missing values, methods assuming balanced groups will have misleading results                                                                                                                                                                                                                                                                                                                                                                                                                                                                                                                                                                                                                                                                                                                                                                   |
| <b>positive skew</b>       | asymmetric distribution of data with more large than small values, common in flow cytometry and many other biological measures (often because zero is the minimum, while there is no fixed maximum)                                                                                                                                                                                                                                                                                                                                                                                                                                                                                                                                                                                                                                                                              |
| <b>data preprocessing</b>  | preprocessing normalises data by changing all values according to one or several defined mathematical equations and can be a prerequisite for specific statistical methods<br>Centring and scaling <ul style="list-style-type: none"><li>• cell count differences are not per se reflective of their biological importance</li><li>• centring and scaling minimizes the stark differences of cell numbers between the cell populations allowing comparisons of fold changes</li><li>• are vital for multivariate statistical methods, otherwise results will be dominated by cells with highest counts/highest noise</li></ul> Transformation <ul style="list-style-type: none"><li>• improves data distribution allowing use of more powerful statistical methods (Keene, 1995; van den Berg et al., 2006)</li></ul> all types of preprocessing can be combined with each other |
| <b>centring</b>            | subtraction of a constant from every value (e.g. the average of each cell population)                                                                                                                                                                                                                                                                                                                                                                                                                                                                                                                                                                                                                                                                                                                                                                                            |
| <b>scaling</b>             | every value is divided by a constant (e.g. the standard deviation, SD)                                                                                                                                                                                                                                                                                                                                                                                                                                                                                                                                                                                                                                                                                                                                                                                                           |
| <b>transformation</b>      | convert each data point by a specific, often nonlinear, but defined mathematical function (e.g. $\log_{10}$ )                                                                                                                                                                                                                                                                                                                                                                                                                                                                                                                                                                                                                                                                                                                                                                    |
| <b>data contaminations</b> | denotes all kinds of problematic values in the data, such as sample outliers, single value outliers or missing values                                                                                                                                                                                                                                                                                                                                                                                                                                                                                                                                                                                                                                                                                                                                                            |
| <b>outlier</b>             | a value so different from the rest, that it could be for example an analytical error                                                                                                                                                                                                                                                                                                                                                                                                                                                                                                                                                                                                                                                                                                                                                                                             |

---

153

154 As the strong compartment effect could mask weaker drivers that alter the inflammatory landscape, we  
155 analysed BALF and lung samples separately (Fig. 3). In the BALF, bleomycin exposure completely



156 altered the inflammatory landscape, separating samples along PC1 (explaining 63.9 % of the variation  
 157 in the dataset). However, the bleomycin effect only accounted for 12.4 % of the variation in the lung,  
 158 separating on PC2 (Supplementary Fig. S2A). Again, macroPCA gave similar results in the analysis of  
 159 the separate compartments (Supplementary Fig. S2B), reconfirming absence of critical outliers.  
 160 Analogous to the PCA findings, HC showed a strong clustering after bleomycin exposure in BALF,  
 161 which was less clear in lung. The influence of day post-treatment and substrain (individual C57BL/6J  
 162 lines) on cell population changes was less distinct, with only some indication towards a possible sub-  
 163 clustering due to these factors (Fig. 3B).

164

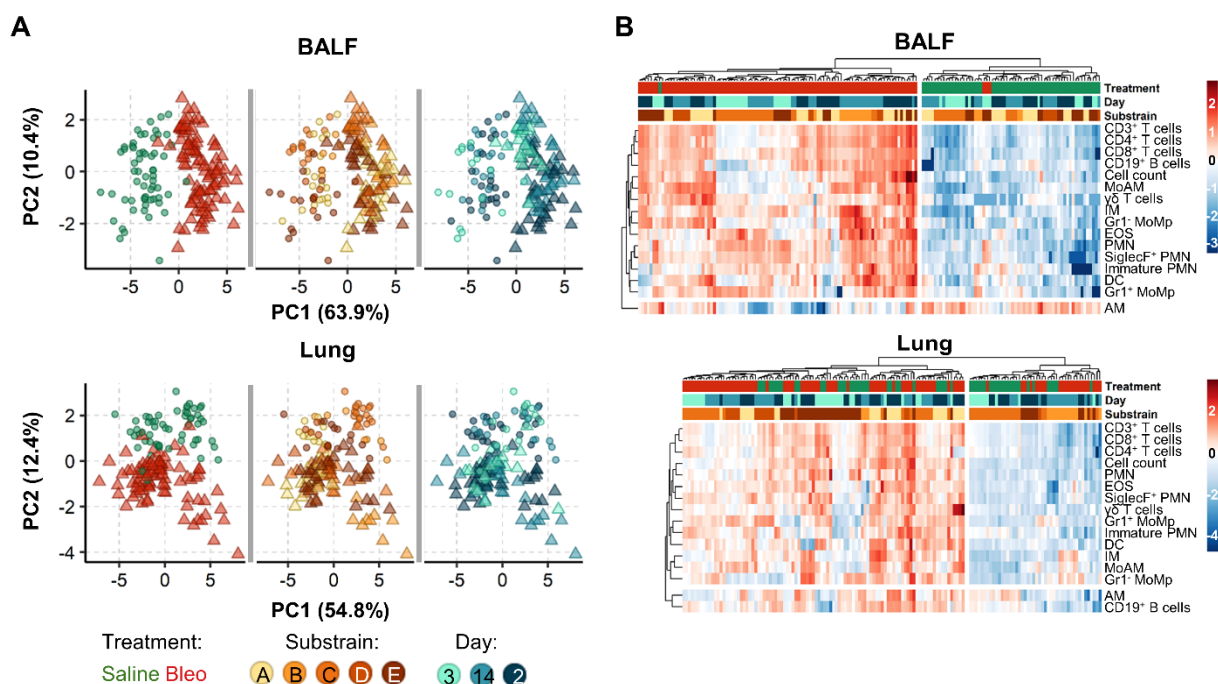

165  
 166 **Fig. 3.** Bleomycin induces stronger changes in the inflammatory profile in the BALF than the lung. The contribution of  
 167 different biological factors to the inflammatory cell profile as determined by (A) PCA scores plots are coloured to  
 168 highlight different experimental conditions, and (B) Heatmaps with hierarchical clustering. To aid interpretation  
 169 heatmaps are split into two main clusters based on dendrogram distances. Colours and shapes represent tissue,  
 170 treatment (Saline, Bleo), mouse substrain and day post treatment. Cell counts from 16 populations in 159 BALF and  
 171 144 lung samples were LOG<sub>x+1</sub> transformed prior to clustering.

## 172 Modelling of inflammatory cell kinetics with univariate statistical analysis

173 In order to examine in depth, the potential influence of other experimental factors and to simultaneously  
 174 control for the unbalanced design arising from the use of historical data, we applied non-linear mixed  
 175 models (NLME, Supplementary Fig. 3). As the multivariate analysis showed a strong bleomycin effect,  
 176 the fixed factor<sup>[Box 2]</sup> *Treatment* {Saline,Bleo} was included in all models<sup>[Box 2]</sup>. Other fixed factors  
 177 included *Day* {3,14,21} and *Substrain* {A,B,C,D,E}. The addition of each factor, either alone or  
 178 together and with or without their interaction with *Treatment*, notably improved the fit<sup>[Box 2]</sup> of all simple

179 models, increasing the goodness of fit and reducing AIC (Supplementary Fig. S3). Thus, both the *Day*  
180 post bleomycin exposure and *Substrain* significantly influenced the cellular landscape.

181

---

## Box 2 | Glossary of model terms

---

|                        |                                                                                                                                                                                                                                                                                                                                                                                                                                                                                                                                                                  |
|------------------------|------------------------------------------------------------------------------------------------------------------------------------------------------------------------------------------------------------------------------------------------------------------------------------------------------------------------------------------------------------------------------------------------------------------------------------------------------------------------------------------------------------------------------------------------------------------|
| <b>model</b>           | a mathematical equation to describing the relationship of measured data to biological factors <ul style="list-style-type: none"><li>• imagine you assume that the weight increases with height, than the biological factor is body height, the measured data is weight and a linear model would have the equation: <math>weight = a \cdot height + b</math></li><li>• parameters are <math>a</math> and <math>b</math>, <math>a</math> – inclination (steepness of the line), <math>b</math> –intercept (<math>weight</math> at <math>height=0</math>)</li></ul> |
| <b>fitting</b>         | finding the best parameter values in the mathematical equation of the model, parameters are optimized to bring the line/curve of the model nearest to the data, often assessed by the residuals                                                                                                                                                                                                                                                                                                                                                                  |
| <b>fixed factor</b>    | also called between-subject effect, a biological factor which (possibly) affects the outcome <ul style="list-style-type: none"><li>• height is a fixed factor in the example, gender would be another possible fixed factor</li></ul>                                                                                                                                                                                                                                                                                                                            |
| <b>interaction</b>     | the impact of one biological factor depends on the occurrence of another biological factor <ul style="list-style-type: none"><li>• imagine to include also gender and genetics as biological factors, the effect that males are roughly 0.13 m taller than females is much smaller in achondroplasia which results in short stature</li></ul>                                                                                                                                                                                                                    |
| <b>random factor</b>   | also called within-subject effect, a factor which (possibly) affects baseline level such as repeated measures from the same source or working in experimental batches <ul style="list-style-type: none"><li>• in linear model example that is to measure the height/weight yearly during adolescence while smaller</li></ul>                                                                                                                                                                                                                                     |
| <b>simple/mixed</b>    | simple models have no random factor, mixed models have a random factor                                                                                                                                                                                                                                                                                                                                                                                                                                                                                           |
| <b>residuals</b>       | difference between fitted value and measured value <ul style="list-style-type: none"><li>• in linear model example that is the distance from the measured value to the line</li></ul>                                                                                                                                                                                                                                                                                                                                                                            |
| <b>fitted value</b>    | the value suggested by the equation for the specific value of the biological factor <ul style="list-style-type: none"><li>• in linear model example that would at a given height the weight on the line</li></ul>                                                                                                                                                                                                                                                                                                                                                |
| <b>predicted value</b> | similar to fitted values the predicted value is suggested by the model equation, but for formerly unknown points (unknown during model fitting or not measured at all) <ul style="list-style-type: none"><li>• imagine the linear model was based on heights from 1 – 1.5 m and you want to predict the weight for 1.7 m</li></ul>                                                                                                                                                                                                                               |
| <b>overfitting</b>     | the model contains more parameters than possible from the data, fails to predict new data correctly <ul style="list-style-type: none"><li>• in the example adding irrelevant factors (e.g. birthdates, house numbers, number of earrings, ...) can produce perfect fits but fail to predict new values</li></ul>                                                                                                                                                                                                                                                 |

---

182

183 As each independent experiment could have similarities, the experimental ID was then included as a  
184 random factor ( $\sim 1|Exp\_ID$ ). These mixed models significantly outperformed the aforementioned simple  
185 models. Finally, complex mixed models (combining the mixed models with the interactions of  
186 *Treatment* with *Substrain* or *Day*) notably outperformed all simple models (with or without  
187 interactions). The most complex mixed model [*Treatment+Day+Substrain+Treatment:Substrain+*  
188 *Treatment:Day,  $\sim 1|Exp\_ID$* ] outperformed all other models, although more prominently in BALF than  
189 in lung (Supplementary Fig. S3A).

190 As complex models risk overfitting, especially in light of the unbalanced design, we then investigated  
191 model simplification. We first tested whether it was possible to create one control group of all saline  
192 animals. In all mixed and complex models (i.e. with random factor *Exp\_ID*) only 4 of the over 10000  
193 investigated pairwise comparisons of a saline subgroup with another saline subgroup had a  $p_{BH} < 0.01$  in

194 any of the 16 cell types. This means saline treated animals were sufficiently similar to be combined into  
195 one control group. Consequently, *Treatment* and *Day* can be then merged into one fixed factor with  
196 four groups: Saline (all days) and bleomycin after days 3, 14, and 21, which was termed *SalineDay*  
197 {Saline,3,14,21}, generating the simplified model [*SalineDay+Substrain*] and the simplified mixed  
198 model [*SalineDay+Substrain~1|Exp\_ID*]. The performance of the simplified mixed model was slightly  
199 lower than in the most complex mixed model, but well within the range of the other top performing  
200 mixed models (Supplementary Fig. S3B).

201 To compare the models in more detail we also directly compared the fitted values<sup>[Box 2]</sup> of the simplified  
202 mixed model with the most complex mixed model. The fitted values from both models strongly  
203 correlated (Pearson correlation  $R^2 > 0.96$ , Supplementary Fig. S3B). This underlines the validity of  
204 model simplification and that no unexpected or systematic skew was introduced. As the simplified  
205 mixed model [*SalineDay+Substrain~1|Exp\_ID*] also gives more easily interpretable results and has a  
206 lower risk of overfitting<sup>[Box 2]</sup>, it was chosen to examine the inflammatory cell kinetics underlying  
207 bleomycin mouse model.

208 This model was then applied to explore how individual substrains may influence the kinetics of different  
209 inflammatory cells. All mice included in this study are on the C57BL/6 background, however were  
210 obtained from different sources e.g. commercial sources (C57BL/6J, substrain A), or are the wild-type  
211 littermates from in-house breedings (substrains B-E). Although some lines were inbred for up to 15  
212 generations, all mouse lines produced similar inflammatory responses in both lung compartments,  
213 differing only in magnitude (Supplementary Fig. S4). This consistency allows to read out the  
214 compartmental kinetics of each cell population after bleomycin treatment for all substrains combined.

### 215 **Inflammatory cell kinetics after bleomycin-induced lung injury are robust and reproducible**

216 Analysis of the inflammatory response in the BALF, identified a non-resolving inflammatory response,  
217 with the total number of inflammatory cells continuing to increase over the investigated time course of  
218 21 days. In the lung tissue, inflammation was characterized by an immediate increase at day 3,  
219 stagnating to day 14 and mostly resolved 21 days post bleomycin exposure (Fig. 4). This suggests that  
220 the inflammatory response is persistent, yet compartment dependent.

221 Early inflammatory changes were mostly dominated by the innate immune system, including both  
222 immature and mature neutrophils, monocyte-derived alveolar and interstitial macrophages. In contrast  
223 we observed a concomitant decrease in alveolar macrophages. Interestingly, the (inverted) trajectories  
224 of alveolar macrophages were comparable to the rise in monocyte-derived macrophages, suggesting a  
225 functional replacement by the latter and supports observations in earlier studies (Misharin et al., 2017).  
226 Following the rapid increase in the first line responders, neutrophils, their numbers later stagnated or  
227 gradually decreased, and even returned to baseline levels in the lung tissue. We also identified a time-  
228 dependent increase in SiglecF<sup>+</sup> neutrophils following bleomycin application. These cells have recently

229 been described to be important for cancer progression (Engblom et al., 2017). Similarly, eosinophils  
 230 and dendritic cells (EOS, DC) exhibited a bell-shape response curve. In contrast monocyte populations  
 231 (both constitutive and inflammatory) exhibited a slower, but consistent, step wise increase over time,  
 232 which could be attributed to their contribution to both the innate and adaptive immunity and their role  
 233 in tissue repair.

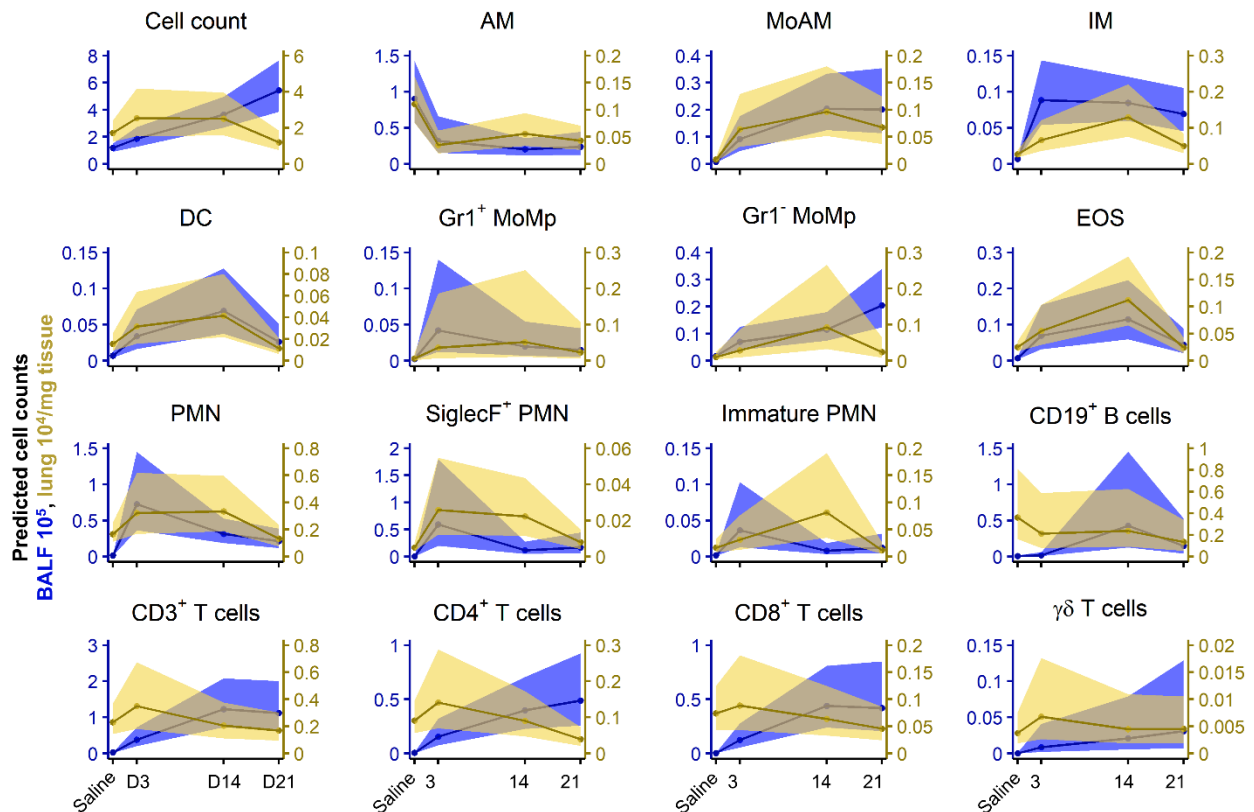

234  
 235 **Fig. 4.** Non-linear mixed models reveal complex immune cell dynamics occurring in the lung following bleomycin induced  
 236 lung injury. Plot of back transformed, fitted cell counts and their 95 % confidence intervals using the simplified mixed  
 237 model [ $SalineDay+Substrain-1|Exp\_ID$ ] of  $LOG_{x+1}$  transformed cell counts for BALF (counts $\cdot 10^5$ ) and lung tissue  
 238 (counts $\cdot 10^4/mg$  tissue). Animal numbers were in BALF in total  $n = 159$  (Saline 60; 3d 23; 14d 39; 21d 37) and in lung  
 239 in total  $n = 144$  (Saline 56; 3d 23; 14d 32; 21d 33).

240 At later time points, inflammation was dominated by immune cells from adaptive immunity, with a  
 241 clear preference to the alveolar compartment. While  $CD3^+$  T lymphocytes ( $CD4^+$  and  $CD8^+$  T cells,  
 242 respectively) had a steep, yet non-resolving, rise early in the inflammatory response, the  $CD19^+$  B cells  
 243 peaked at 14 days post bleomycin challenge. Interestingly, at the latest time point, 21 days, B cells  
 244 numbers still continued to rise, implicating their involvement at later stages in this model (Fig. 4A).

245 Taken together, the multiple inflammatory cell populations show dynamic and distinct inflammatory  
 246 kinetics with clear compartment preferences. With time the involved immune cells shifted from the  
 247 innate to the adaptive immune system, with the BAL being more prominently affected then the lung  
 248 tissue. After 21 days the inflammatory profile was still chronically altered.

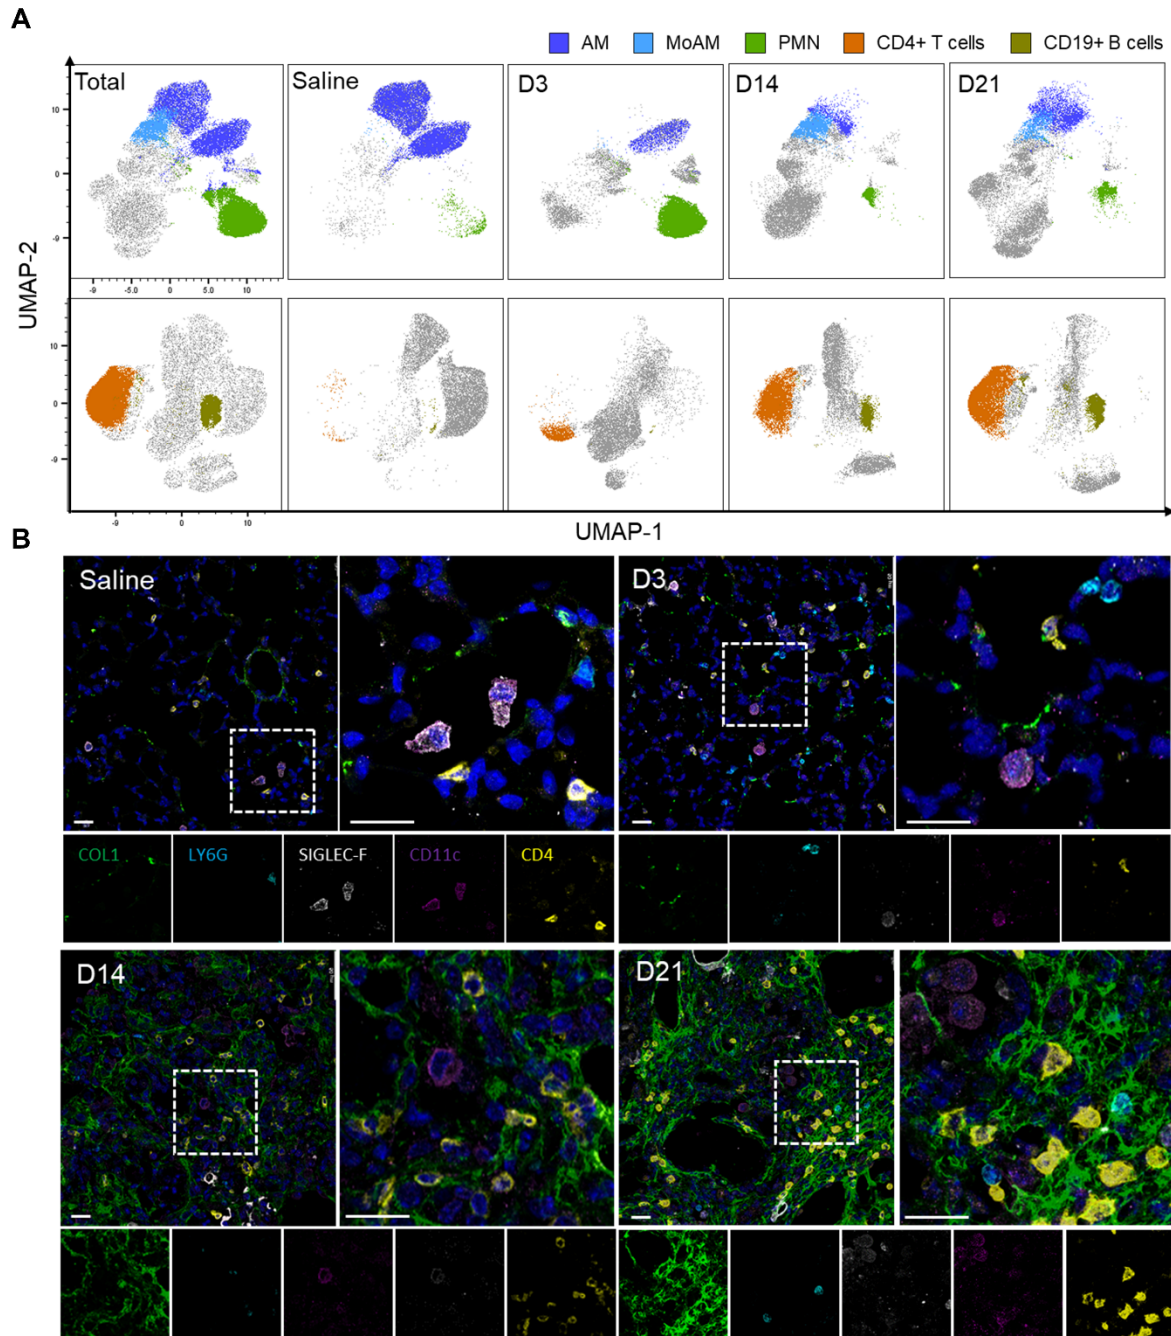

249  
250 **Fig. 5.** Temporal and spatial localization of inflammatory cell kinetics in BALF and lung tissue. (A) Uniform Manifold  
251 Approximation and Projection (UMAP) plots of concatenated CD45<sup>+</sup> populations (min 3 independent samples with  
252 max 10'000 CD45<sup>+</sup> cells per sample) with overlaid manually gated populations in BALF. (B) Spatial localisation of  
253 alveolar macrophages (CD11c<sup>+</sup>/SiglecF<sup>+</sup>), neutrophils (LY6G<sup>+</sup>), and CD4<sup>+</sup> T cells during the time course of bleomycin  
254 challenge. Nuclei are stained with DAPI (dark blue). Representative pictures of three independent mice at each  
255 time point. D3, D14 and D21, represent days 3, 14 and 21 post-bleomycin treatment, respectively.

256 Based on these results we went back to our FCM data and visualised the kinetics of the most  
257 dynamically altered populations via computational FCM (Fig. 4B). As predicted in our modelling data  
258 AM populations strongly decreased after bleomycin exposure, while the innate PMNs vastly expanded  
259 after 3 days. Adaptive immune cells such as CD4<sup>+</sup> T cells, CD8<sup>+</sup> T cells and CD19<sup>+</sup> B cells expanded

260 more at later time points and were virtually absent in saline treated mice (Fig. 5A). Visualisation using  
261 multi-colour immunofluorescence revealed the co presence of CD11c<sup>+</sup>/SiglecF<sup>+</sup> AM, CD4<sup>+</sup> T cells and  
262 Ly6G<sup>+</sup> neutrophils in fibrotic lung tissue (Fig. 5B), the spatiotemporal presence of these cells point  
263 toward close interplay between inflammatory components.

### 264 **The inflammatory cell landscape continually evolves following bleomycin exposure**

265 The combination of unsupervised multivariate methods and univariate NLME identified the kinetics of  
266 each cell type with an early innate response followed later by adaptive immune response. However, the  
267 question how the entire landscape differs between different timepoints or which cell types define each  
268 stage is still open. In order to answer these questions, we applied three robust machine learning  
269 approaches.

270 Our first approach, OPLS-DA separates the dataset into predictive and non-predictive components.  
271 Predictive means the ability to discern between groups in the given classification factor, which was here  
272 *SalineDay* {Saline,3,14,21}. The OPLS-DA model quality was thoroughly investigated by cross-  
273 validation and permutations tests showing that in both compartments the models were highly significant  
274 (Q<sub>2</sub>>50 %, p<0.001). Similar to our PCA results (Fig. 3), the inflammatory reaction was more  
275 pronounced in the BALF than in the lung, as apparent from a clearer group separation, higher  
276 percentages of variability in the predictive component and higher predictive ability (Q<sub>2</sub>; Fig. 6A). In  
277 BALF, the inflammatory landscape at 14 and 21 days post bleomycin were very similar, but very  
278 different from the saline controls, while the landscape at 3 days bridged these two poles.

279 We next investigated conditional inference trees and random forest models to infer which cell  
280 populations were the driving factors behind the group differences. Conditional inference trees in the  
281 BALF demonstrated that CD3<sup>+</sup> T cells levels separated early (Saline, D3) and later timepoints (D14,  
282 D21). Separating samples on low and high CD19<sup>+</sup> B cells distinguishes between days 14 and 21,  
283 respectively. On the other hand, low levels of PMN strongly predicts saline treated mice and the  
284 combination of low AM and SiglecF<sup>+</sup> PMN aiding the separation between saline, D3 and D14 (Fig.  
285 6B). In the lung compartment, both innate cells (MoAM, AM) and adaptive (CD4<sup>+</sup> T cells and CD19<sup>+</sup>  
286 B cells) were needed to define the different groups. Saline mice were defined by low levels of MoAM  
287 and high AM, while bleomycin treatment by high MoAM and CD4<sup>+</sup> T cells. Similar to the BALF, day  
288 21 was marked by high CD19<sup>+</sup> levels, while D14 by was defined by lower B cell and MoAM levels  
289 (Fig. 6B). A combination of low MoAM and low AM defined day 3.

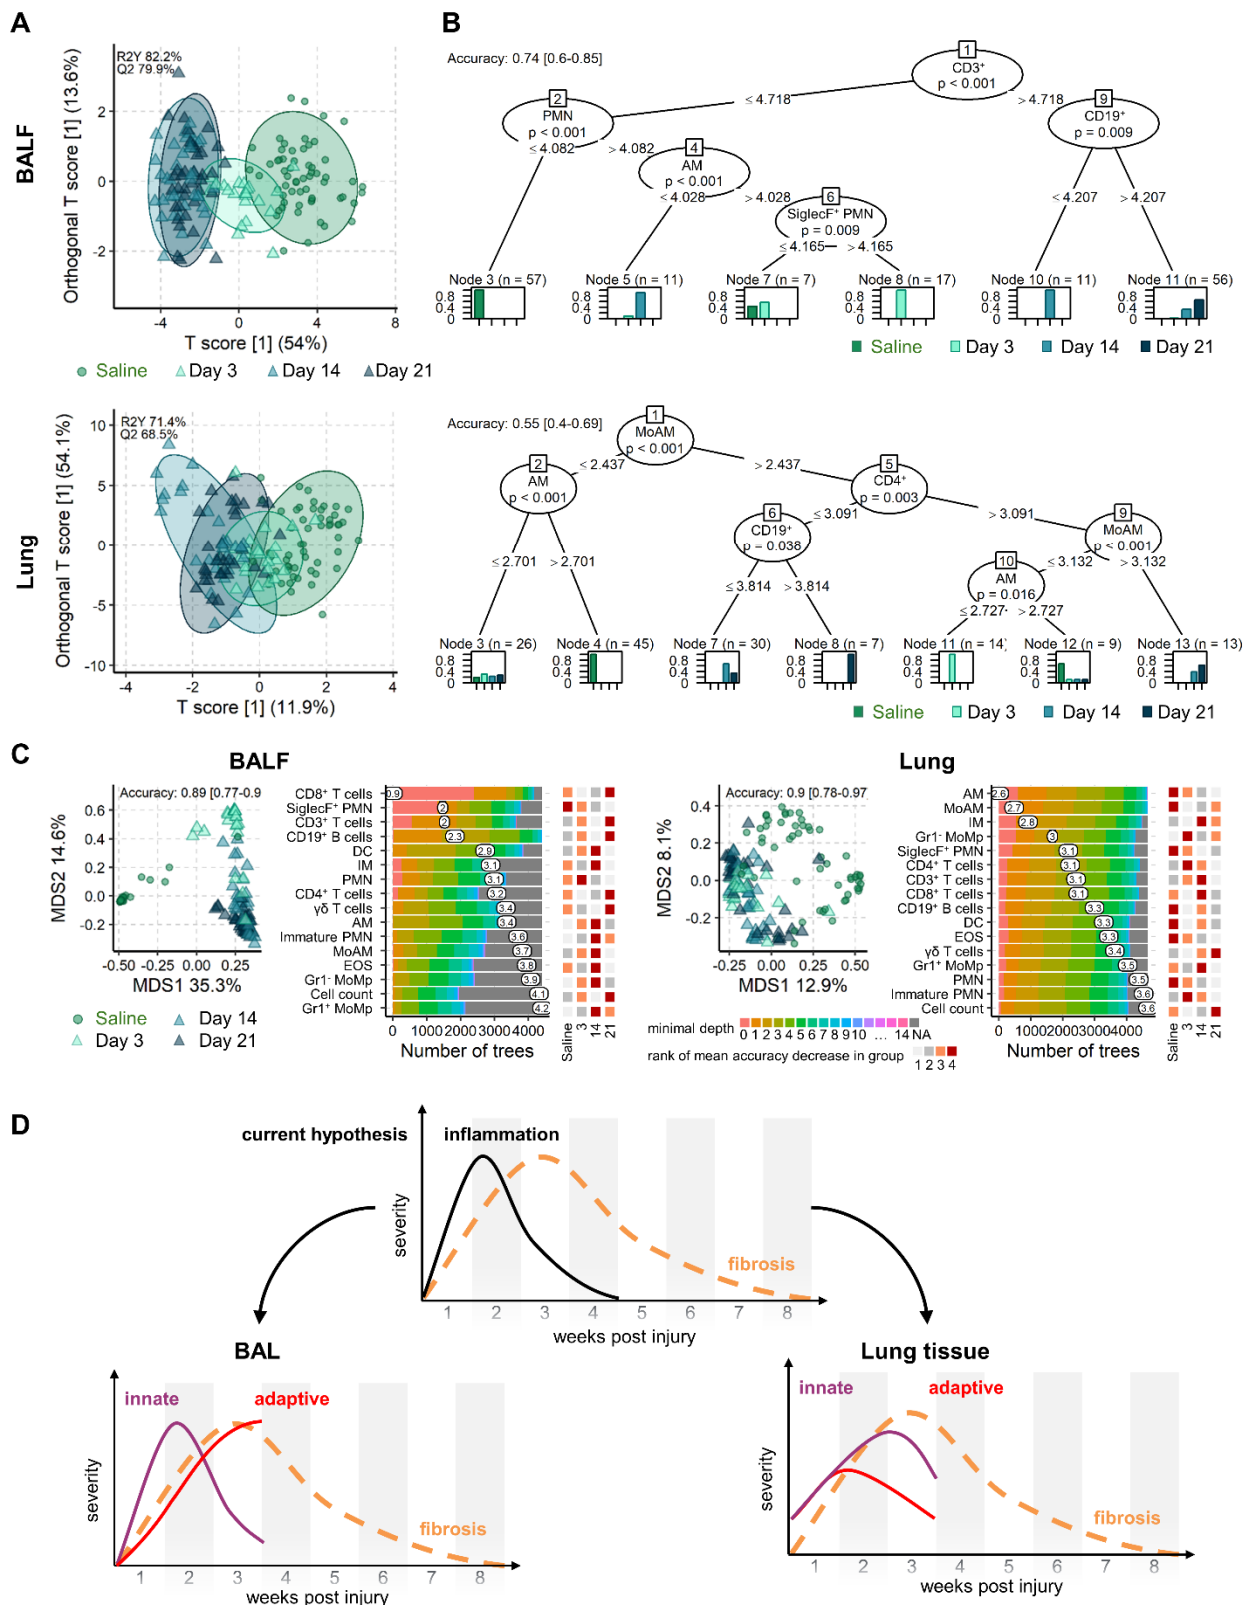

290  
291 **Fig. 6.** Exploration of inflammatory cell landscape differences with machine learning in BALF and lung tissue. (A) Scores  
292 plot of OPLS-DA models per compartment for the factor *SalineDay* {Saline,3,14,21} with 95 % confidence ellipses  
293 for each group. The predictive ability of the models  $Q^2$  was calculated by 7-fold cross validation and 1000 permutation  
294 tests reconfirmed model significance with  $p < 0.001$ . (B) Conditional inference trees per compartment, showing cell  
295 types and cut-offs that define each group; saline, days 3, 14 and 21 post bleomycin treatment (*SalineDay*). Model  
296 accuracy was evaluated with a stratified split into 65 % trainings and 35 % test set. (C) MDS plot (left panel) of the

297 proximity matrix of random forest models grown with 5000 trees. Model accuracy was evaluated with a stratified split  
298 into 65 % trainings and 35 % test set. The distribution of the minimal depth is shown for each cell type according to  
299 the number of trees, the mean of the minimal depth is shown (middle panel). The rank of the mean decrease in accuracy  
300 within each group is shown for each cell population (right panel). Animal numbers in all models from A-C were in  
301 BALF in total n = 159 (Saline 60; 3d 23; 14d 39; 21d 37) and in lung in total n = 144 (Saline 56; 3d 23; 14d 32; 21d  
302 33). Models were based on  $\text{LOG}_{x+1}$  transformed cell counts for BALF (counts $\cdot 10^5$ ) and lung tissue (counts $\cdot 10^4/\text{mg}$   
303 tissue). (D) Schematic, abstracted summary of all previous findings differentiating between the compartments BAL and  
304 lung tissue.

305 Random forest models were then used to compare the ability of all cell populations to drive group  
306 separation. In agreement with previous results, again group separation was clearer in BALF than in  
307 lung, as demonstrated by multi-dimensional scaling plots of the random forest proximity matrix and  
308 higher accuracy (Fig. 6C). In BALF especially the adaptive immune cells  $\text{CD8}^+$  and  $\text{CD3}^+$  T cells as  
309 wells as the innate  $\text{SiglecF}^+$  PMN differed most, as became apparent from their low minimal depth.  
310 Between the different groups high  $\text{CD8}^+$ ,  $\text{CD3}^+$  and  $\text{CD19}^+$  levels were most predictive for late  
311 inflammation while low  $\text{SiglecF}^+$  PMN levels were most predictive for the cellular landscape in saline  
312 samples. The random forest suggests some fine but distinct differences between the global inflammatory  
313 landscape 14 and 21 days after bleomycin exposure (Fig. 6C). Although both are highly inflamed  
314 (OPLS-DA), higher levels of adaptive cells are rather predictive for day 21 (e.g. all T and B cells), while  
315 higher levels of some innate cells are more predictive for day 14 than day 21 (e.g. DC, IM, immature  
316 PMN, MoAM, EOS) or day 3 (PMN). In contrast, lung models were dominated by macrophage cell  
317 populations differing most between the inflammatory stages, foremost the depletion of alveolar  
318 macrophages. The random forest models underline that the inflammatory landscape differs notably  
319 between lung and BALF.

320



## 321 Discussion

322 In this study, we have combined computation FCM, advanced data modelling and machine learning  
323 approaches to conclusively define the inflammatory cell kinetics following bleomycin treatment in  
324 mice. By combining the data from 15 independent experiments, we amassed very large sample numbers,  
325 which were far in excess of those normally found in animal experiments. The aggregation of historical  
326 samples inherently led to an unbalanced experimental design, which was handled by sophisticated,  
327 robust statistical methods. By using pre-processing techniques such as data transformation, we could  
328 substantially improve analysis power, which crucially contributed to clearer data interpretation.  
329 Changes in the inflammatory profile was dissected using multivariate and univariate statistical methods  
330 including non-linear mixed models. Only by applying these techniques in unison were we able to create  
331 the most comprehensive picture of inflammatory cell trajectories to date and characterise the sustained  
332 inflammation in the bleomycin model of pulmonary fibrosis.

333 FCM data is normally highly asymmetric i.e. it has many larger values but no values smaller than zero,  
334 this non-normal distribution prevents the use of more powerful analysis methods. To re-establish  
335 normality we trialled several transformations, but ultimately settled on  $\text{LOG}_{x+1}$  as it normalised the data  
336 distribution, can be easier to interpret and also slightly improved the scedasticity compared to 4RT. Our  
337 data modelling approach resulted in a very large sample size, which notably increased statistical power  
338 and outweighed the potential drawbacks of added confounding variation from experimental runs or the  
339 use of different substrains. Furthermore, when experimental covariance was accounted for as random  
340 factor in NLME models, the inflammatory profiles in the BALF and lung tissue of all saline treated  
341 animals, irrespective of experiment, were sufficiently similar to be combined into one large control  
342 group. Secondly, the trajectories of inflammatory cell profiles were found to be consistent for all five  
343 substrains, although their magnitudes slightly differed, which is important for experimental  
344 reproducibility in light of using different knockout lines or mice sourced from different companies.

345 The application of unsupervised and supervised as well as multivariate and univariate, demonstrated  
346 how the changes for most populations were more prominent in the BALF than in lung tissue, although  
347 the majority of populations showed consistent trajectories in both compartments. In healthy mice, the  
348 vast majority of cells in the BALF are alveolar macrophages, while in the lung tissue even at baseline  
349 conditions, a highly heterogenous pool of inflammatory cells exists, including macrophages neutrophils,  
350 T and B cells. Due to the higher sensitivity of the BALF to monitor inflammatory changes, we would  
351 recommend this as the compartment of choice for the majority of cells in FCM analysis. Analysis of  
352 the BALF has further advantages such as being easily accessible, without need for additional tissue  
353 digestion steps.

354 Our comprehensive analysis of multiple inflammatory cell population at several time-points, describes  
355 the kinetics not only during disease development but also when it is fully established. The initial

356 inflammatory phase after bleomycin exposure was dominated by early responder cell types from the  
357 innate immune system of the myeloid lineage. Neutrophils constitute the first line defence of the  
358 immune system and consequently show very acute kinetics, being rapidly recruited and also being the  
359 first cell type to resolve, visible as pronounced decreases from day 3 to day 14 after the challenge. In  
360 contrast, cells from adaptive immune system, such as B and T cells, increased much slower but continue  
361 to expand even at 21 days. The worth of subtyping cell populations is apparent by the inverse kinetics  
362 displayed within macrophages, which is only possible by using multicolour analysis. We could show  
363 that while the numbers of alveolar macrophages (AlvMp) quickly decrease, monocyte derived  
364 macrophages (MoAM) increase. These contrary trajectories would explain the early observation that  
365 macrophage numbers were unchanged in this model (Izbicki et al., 2002), but the closer analysis of  
366 macrophage subtypes revealed strong dependent changes, as shown by (Misharin et al., 2017, 2013)  
367 and now reconfirmed by our results.

368 Increasingly macrophage heterogeneity has been suggested to play an important role in the pathogenesis  
369 of lung fibrosis and have implications for therapeutic strategies. MoAM undergo marked transcriptional  
370 changes during their differentiation in the injured lung tissue. These changes are not only associated  
371 with a continuous down-regulation of genes typically expressed in monocytes and up-regulation of  
372 genes expressed in alveolar macrophages but also with markedly elevated expression of  
373 proinflammatory and profibrotic genes related to M1 and M2 phenotype. This unique transcriptomic  
374 signature of MoAM provides an explanation how bleomycin-induced lung fibrosis is attenuated  
375 following selective depletion of these cells (Joshi et al., 2020; McCubbrey et al., 2018; Misharin et al.,  
376 2017). Interestingly, the existence of common profibrotic pathways in MoAM harvested from mice  
377 during fibrosis development and profibrotic macrophages obtained from the lungs of IPF patients has  
378 been reported (Aran et al., 2019; Misharin et al., 2017). All these observations strongly suggest that  
379 selective targeting profibrotic macrophages, rather than the M1 or M2 phenotype, is more likely to be  
380 of benefit in such a complex disease as IPF. The potential contribution of MoAM to the resolution of  
381 lung fibrosis is still open and remains the subject of future studies. Recent data supports this hypothesis  
382 (Cui et al., 2020). Hence, MoAM could represent very plastic cell population with distinct functions in  
383 different phases of lung fibrogenesis.

384 Early and late fibrotic stages were characterized by increased numbers of T and B cells in the BALF,  
385 while numbers in the lung tissue remained relatively stable, this reflects earlier reports describing the  
386 presence of T cells in IPF lungs (Balestro et al., 2016; Todd et al., 2013). Here B cells are of particular  
387 interest, as abnormal B cell aggregates have been described in IPF lungs (Marchal-Sommé et al., 2006)  
388 and diverse circulating IgG autoantibodies were found in IPF plasma (Kurosu et al., 2008; Ogushi et  
389 al., 2001; Taillé et al., 2011). Furthermore, individual auto-immunoglobulins were linked to severity  
390 and/or poor prognosis of IPF (Kahloon et al., 2013; Ogushi et al., 2001) thus suggesting the causal role  
391 of certain autoantigens in IPF. Accordingly, transcriptome-profiling of lung tissue derived from

392 pirfenidone-treated patients revealed downregulation of B cell related genes (Kwapiszewska et al.,  
393 2018). Future studies will, however, demonstrate whether these findings open an exciting new avenue  
394 for immunotherapy-based approaches in IPF.

395

## 396 **Limitations**

397 Despite analysing three independent timepoints, which cover the major stages of the bleomycin model,  
398 some timepoints are still missing. However, we consciously wanted to reuse existing experiments and  
399 avoid sacrifice of new animals. Future investigation would profit from an expansion, e.g. by inclusion  
400 of existing measurements from other groups, to cover also the progression from the initial inflammation  
401 towards active fibrosis phase by including analysis at day seven. Similarly, inflammatory profiling  
402 during fibrosis resolution, i.e. after 28 or 35 days, would deliver valuable insights on the involvement  
403 of specific subtypes during resolution. From a statistical point of view, the unbalanced study design  
404 with differing sample numbers in subgroups is unfavourable, which complicates analysis and loses  
405 some power. However, our use of robust methods such as NLME and machine learning methods  
406 (random forest) were able to overcome these limitations. Although over a dozen independent  
407 experimental runs were included, this is not a multi-centric study. Quantitative comparison of results  
408 from other laboratories at other sites and other strains/substrains would allow to even better explore  
409 bleomycin model system robustness and reproducibility. In this study, manual gating was used to  
410 identify different cell populations, thereby including expert knowledge into the analysis and gating  
411 specificity was confirmed shown by UMAP overlays. For some populations in the UMAP plots (e.g.  
412 AM), the populations were more spread than expected, this was most likely due to do different marker  
413 intensity (in this case CD11c) between different experimental runs. The topic of auto-gating is rapidly  
414 developing and promises to considerably save hands-on time and foremost the potential to detect rare,  
415 otherwise undetected cell subpopulations. The focus of this study was to primarily determine the  
416 inflammatory cell kinetics, however to further unravel the role of inflammation and potential therapeutic  
417 targets in fibrosis a quantified link of cell subpopulations to fibrotic processes is warranted.

## 418 **Recommendations**

419 This study explored fundamental aspects of the bleomycin animal model with good power owing to the  
420 high sample numbers so that constructive recommendations can be inferred.

421 (I) In order to ascertain technical success of the experiment we strongly recommend to always include  
422 a negative control (saline) and a positive control (bleomycin, transgenic or knock out otherwise  
423 untreated) group with each  $n \geq 8$ . Foremost this serves to rate the strength of induced fibrosis and  
424 technical quality of the experiment. Statistical power gain is very high for every added sample in the

425 single digit region. An  $n\#$  of  $\geq 8$  leaves some safety margin to stay above the critical level of  $n=5$  to  
426 handle the occasional, unavoidable loss of samples due to premature death or technical problems.

427 (II) For more sensitive and pronounced inflammatory readouts BALF should be routinely sampled  
428 together with lung tissue and both samples should be subjected to analogous analysis.

429 (III) For subsequent statistical analysis we strongly recommend to investigate distribution and potential  
430 for improvements from data transformations and especially for multivariate methods additional centring  
431 and scaling. We also recommend to use both multivariate and univariate, unsupervised and supervised  
432 methods as they complement each other well in their type of generated insights.

### 433 **Conclusions**

434 The measurement of inflammatory cellular landscapes in the bleomycin-induced lung-injury mouse  
435 model with flow cytometry is very robust and suitable to quantify kinetic changes in multiple cell  
436 populations simultaneously. The results allowed to infer recommendations such as to add negative and  
437 positive control, apply data pre-processing, combine multivariate and univariate methods and to  
438 routinely also investigate BALF. We also found that the unintended development of potential substrains  
439 does not per se hinder general reproducibility of results and the approach to adapt bleomycin doses to  
440 the current experimental run is viable. This study underlines the relevance of combined analysis for  
441 more holistic insights into inflammatory profile changes. Cell populations show quite distinct  
442 trajectories in their kinetics. We also conclude that inflammatory cell-based response is active before,  
443 during and after manifestation of fibrosis with a shift from the initial innate immune cell domination  
444 towards the adaptive arm and inflammatory cell accumulation is not resolved after 3 weeks.

445

## 446 **Material and Methods**

### 447 **Animals**

448 All animal experiments were approved by the local authorities (Austrian Ministry of Science, Research  
449 and Economics) (BMWF-66.010-0038-II-3b-2013, BMWFW- 66.010/0038-WF/II/3b/2014,  
450 BMWFW-66.010/0049-WF/V/3b/2017, 66.010/0177-WF/3b/2017) and were performed in accordance  
451 with relevant guidelines and regulations. Wild type groups of several different, independent  
452 experiments (unpublished and published (Biasin et al., 2017)) were pooled and analysed. For each  
453 experimental run wild type mice were obtained from Charles River or bred in-house in case of wild  
454 type littermates and are annotated as separate strains. Overview of all strains and group sizes is given  
455 in Supplementary Table S1. All mice were maintained with 12 h light/ dark cycles and they had access  
456 to water and standard chow *ad libitum*.

### 457 **Bleomycin challenge and animal handling**

458 Male mice (25-30 g body weight) were anesthetized with isoflurane 2–2.5 % and intra-tracheal  
459 administered with bleomycin (Sigma, Vienna, Austria) or saline solution (0.9 % w/v NaCl) using a  
460 MicroSprayer® Aerosoliser (Penn-Century Inc., PA, Pennsylvania, USA), as previously described  
461 (Biasin et al., 2020, 2017). Each bleomycin lot was titrated to give a comparable response for each  
462 strain; dose range was 0.7-3.5 U/kg b.w., Supplementary Data 1). After bleomycin instillation, mice  
463 were closely monitored till they completely recovered from anaesthesia. Bleomycin or saline solution  
464 administration was performed once and animals were sacrificed after 3, 14 or 21 days.

### 465 **BALF and lung tissue preparation for flow cytometry**

466 Mice were euthanized via exsanguination and the lungs were perfused with phosphate buffered saline  
467 (PBS; 137 mM NaCl, 2.7 mM KCl, 10 mM Na<sub>2</sub>HPO<sub>4</sub>, 1.8 mM KH<sub>2</sub>PO<sub>4</sub>, pH 7.2), through the right  
468 ventricle. Mice were then lavaged with 1 ml PBS containing the Pierce protease inhibitor cocktail  
469 (ThermoFisher Scientific, Vienna, Austria) and 1 mM EDTA. The obtained BALF was centrifuged,  
470 washed with 1 ml MACS buffer (2 mM EDTA, 0.5 % BSA in 1X PBS), before being resuspended in  
471 0.5 ml for cell counting and consequent FCM staining. Single cell lung tissue homogenates were  
472 performed as previously described (Nagaraj et al., 2017). Briefly, the lower right lobe was weighed, cut  
473 into approximately 1 mm pieces and digested with 0.7 mg/ml Collagenase and 30 µg/ml DNase in  
474 RPMI medium supplemented with 10 % FCS, 2 mM glutamine and 1 % penicillin-streptomycin  
475 (ThermoFisher Scientific) for 40 min at 37 °C with rotation at 350 rpm. The minced tissue was passed  
476 through a 100 µm cell strainer to obtain a single cell suspension. In case of red blood cells  
477 contamination, the cell suspension was treated with erythrolysis buffer (2.6 mM NH<sub>4</sub>Cl, 0.09 M KCO<sub>3</sub>,  
478 0.6 M EDTA) for 5 min at room temperature. The number of live cells were counted using trypan blue

479 exclusion and then stained with fixable viability stain (ThermoFisher Scientific), washed and then fixed  
480 with 1 % paraformaldehyde for 15 min on ice before being resuspended in MACS buffer.

#### 481 **Flow cytometry**

482 Single cell suspensions were initially incubated with an Fc-receptor-binding antibody (ThermoFisher  
483 Scientific) for 5 min on ice to prevent nonspecific binding. A master-mix containing one of two different  
484 antibody combinations against cell surface markers (Supplementary Table S2) was added to the cells  
485 incubated for 20 min at 4 °C. For each sample between 30'000 and 300'000 events were recorded on a  
486 LSRII Flow Cytometer (BD Biosciences, Vienna, Austria) or Cytotflex S (Beckman Coulter, Vienna,  
487 Austria). Samples were analysed either using FACSDiva (BD Biosciences) or FlowJo v10.6.2 (LLC,  
488 Ashland, Oregon) software by users blinded to treatment condition. Cells were initially gated on FSC  
489 and SSC characteristics and duplexes were removed using FSC-A / FSC-H dot blot, dead cells were  
490 gated out using viability exclusion. Cells positive for the pan-leukocyte marker CD45 were taken for  
491 further analysis, cell populations were identified using the gating strategy (Fig. 1C and Table 1), as  
492 described in the results and based on published studies (Biasin et al., 2017; Gungl et al., 2018; Misharin  
493 et al., 2017, 2013; Tighe et al., 2019b). A complete description of all antibodies is given in  
494 Supplementary Table S2. Cell numbers are reported  $10^5$  in the BALF and  $10^4$ /mg tissue for the lung.  
495 Uniform Manifold Approximation and Projection (UMAP) plots were performed in FlowJo, using  
496 default settings (nearest neighbours 15, minimum distance value 0.5, Euclidean distance). First, fcs files  
497 from at least three individual mice per analysis timepoint were downsampled to max 10'000 events and  
498 then concatenated. Manually gated populations were then overlaid on UMAP plots to determine they  
499 kinetics.

#### 500 **Trichrome and immunofluorescence staining**

501 After BALF, the lungs were inflated with 4 % formalin via the trachea and then paraffin embedded.  
502 Slides were cut at 2.5  $\mu$ m thick and stained with Masson's trichrome according to standard protocols.  
503 Slides were scanned and imaged with a Virtual Slides VS120 Microscope and OlyVia Software (both  
504 from Olympus, Vienna, Austria). For multi-colour immunofluorescence staining, 2.5  $\mu$ m paraffin-  
505 embedded lung sections were dewaxed and subjected to heat induced antigen retrieval at pH6 (Perkin-  
506 Elmer, Waltham, MA) using an antigen retrieval chamber for 15 min at 200 W. Slides were blocked  
507 with Perkin-Elmer Antibody Block solution for 20 min in a humidified chamber, and primary antibodies  
508 (Supplementary Table S3) were sequentially incubated o/n 4 °C in Perkin-Elmer Antibody Diluent.  
509 After washing with TBS-T (274 mM NaCl, 47.6 mM Tris HCl + 2 % v/v Tween20 in H<sub>2</sub>O) primary  
510 antibodies against CD4, SiglecF and CD45 were detected with the Opal Polymer HRP secondary  
511 antibody (Perkin-Elmer), using the Opal 540, 620, 690 substrates, respectively. Antibodies against  
512 Collagen I, CD11c and CD45 were used simultaneously and detected with AlexaFluor-conjugated  
513 secondary antibodies, donkey anti-goat AlexaFluor488, donkey anti-rabbit AlexaFluor555, chicken

514 anti-rat AlexaFluor647, respectively. Nuclear counterstaining was performed with DAPI solution  
515 1 mg/ml (ThermoFisher Scientific).

### 516 **Confocal imaging**

517 For imaging immunofluorescence stained slides, a Leica TCS-SP8 (DMi8 inverted microscope with a  
518 LIAchroic scan head) lightning confocal microscope was used (Leica, Wetzlar, Germany). The  
519 acquisition process followed a “sequential workflow” with well-defined settings (shown in  
520 Supplementary Table S4). In order to minimize fluorescent overlap the plugin “Channel Dye  
521 Separation” of Leica Imaging system was used. The following objectives were used: Plan Fluotar  
522 20x/0.75 multi immersion objective and Plan Fluotar 40x/1.25 glycerol immersion objective. Images  
523 were acquired at 2048 x 2048 and a pixel size of 142 x 142nm.

### 524 **Statistical analysis**

525 Data visualisation and statistical analysis were performed with R v3.6.3 (R Core Team, 2020) (using  
526 the packages readxl, openxlsx, plyr, stringr, tidyr, reshape, colorspace, RColorBrewer, ggplot2, ggpubr,  
527 ggrepel, gridExtra, magrittr, cowplot, plotly, lemon, lawstat, dendsort, pheatmap, cellWise, missMDA,  
528 FactoMineR, nlme, emmeans, MetaboAnalystR 2.0, caret, randomForest, randomForestExplainer,  
529 partykit, e1071), TIBCO Spotfire v10.9.0, TIBCO, Palo Alto, CA and FlowJo v10 (LLC, Ashland,  
530 Oregon).

531 All reported p-values were adjusted for multiple testing according to Benjamini-Hochberg (BH)  
532 denoted as  $p_{BH}$  (R function *p.adjust*). Distribution and scedasticity were investigated with Kolmogorov-  
533 Smirnov test and Brown-Forsythe Levene-type test, respectively ( $p_{BH}$  Supplementary Data 1). Seven  
534 common transformations were tested: square root, reciprocal, Freeman Tukey, logit (on counts mapped  
535 to 0.25-0.75), LOG,  $LOG_{x+1}$ , 4RT (Supplementary Fig. S1).

536 Principal component analysis (PCA) analysis (R function *prcomp*) was performed centred and scaled  
537 to unit variance (z-scaled) on total cell counts (untransformed,  $LOG_{x+1}$  or 4RT transformed). The dataset  
538 (303 samples, 16 cell populations) contained no missing values and 1.3 % zeros. MacroPCA analysis  
539 (R function *MacroPCA*) was performed centred and scaled to unit variance on total cell counts  
540 (untransformed,  $LOG_{x+1}$  or 4RT transformed). The number of components was set to cumulatively  
541 retain 80 % of explained variance, but to deliver between two and ten components. Hierarchical  
542 clustering analysis was performed centred and scaled to unit variance (R function *scale*) on total cell  
543 counts, for untransformed data per cell type than samples.  $LOG_{x+1}$  or 4RT data was centred and scaled  
544 only per cell type. The dendrograms were clustered by Lance-Williams dissimilarity update with  
545 complete linkage (R function *dist* and *hclust*) and sorted (R function *dendsort*) at every merging point  
546 according to the average distance of subtrees and plotted at the corresponding heat maps (R function  
547 *pheatmap*).

548 Non-linear mixed models were fitted (R function simple models *gls* or mixed models *lme* with  
549 maximum likelihood (ML), with LOG<sub>x+1</sub> transformation and no longitudinal covariance applied (mice  
550 were sacrificed at each time point). Model selection was based on the forward addition approach and  
551 complex models were rechecked by backward dropping of factors. Simple models were constructed  
552 using the forward addition approach incorporating the fixed factors *Treatment* {Saline,Bleo}, *Day*  
553 {3,14,21} post treatment and the mouse background, *Substrain* {A,B,C,D,E}. The interactions,  
554 *Treatment:Substrain* and *Treatment:Day* were include to determine whether the treatment effect  
555 depended on the *Substrain* or *Day*. Mixed models additionally included the experimental ID as a random  
556 factor (~1|Exp\_ID). Complex mixed models were created by combining mixed models with the  
557 interactions *Treatment:Substrain* and/or *Treatment:Day*. Models were then simplified by merging all  
558 saline samples into one control group generating the simple model [*SalineDay+Substrain*] and by  
559 including *Exp\_ID* as a random factor the mixed model [*SalineDay+Substrain~1|Exp\_ID*]. Due to rank  
560 deficiencies arising from the unbalanced design the model *SalineDay:Substrain* was not possible.  
561 Criteria for model performance and suitability were lower AIC (Akaike information criterion; relative  
562 estimate of information loss), higher log-likelihood (goodness of fit), significance in log likelihood ratio  
563 test comparing two models, quality of Q-Q plots and randomness in residual<sup>[Box 2]</sup> plots (Supplementary  
564 Data 1 and Supplementary Fig. S2). Post-hoc pairwise comparisons were readout as back transformed  
565 estimates (R function *emmeans*, type = “response”) with  $p_{BH} \leq 0.05$  being considered statistically  
566 significant.

567 Orthogonal projections to latent structures discriminant analysis (OPLS-DA) on LOG<sub>x+1</sub> data was  
568 performed centred and scaled to unit variance (R function *Normalization* with scaleNorm=”AutoNorm”  
569 and R function *OPLSR.Anal*) with a standard 7-fold cross validation for the classification factor  
570 *SalineDay*. Model stability was additionally verified with 1000 random label permutations.

571 Conditional inference trees were fit with default settings (R function *ctree*) which limits tree size to  
572 include only significant splits avoiding overfitting, so that no further cross-validation or pruning was  
573 applied. The random forest (R function *randomForest*) error rates decrease markedly within the first  
574 100 trees and stabilized fully after 1500 to 2500 trees. All reported random forests grown with 5000  
575 trees to guarantee stability and hyperparameter, mtry (8 in BALF and 2 in lung) was tuned to minimal  
576 out-of-bag errors (OOB) (R function *tuneRF*). The model stability and prediction quality (R function  
577 *confusionMatrix*) of conditional inference trees and random forest was evaluated by splitting the  
578 LOG<sub>x+1</sub> randomly into trainings/test set (65 % / 35 %) stratified for the classification factor *SalineDay*  
579 (R function *createDataPartition*).

580



581 **Author contributions**

582 Conceptualisation, Data curation, Formal analysis, Software, Visualisation and Validation, N.B and  
583 L.M.M; Methodology, L.M.M; Investigation, V.B, B.M.N, F.V, N.S, K.J and L.M.M; Resources, V.B,  
584 B.M.N., N.S., K.J., G.K. and L.M.M.; Writing – original draft, N.B, V.B, G.K, M.W, L.M.M; Writing  
585 – Review & Editing, all authors; Project administration, Supervision and Funding acquisition, G.K. and  
586 L.M.M.

587 **Acknowledgements**

588 We are very grateful for the technical assistance from Kerstin Schweighofer, Sabine Halsegger, Thomas  
589 Fuchs, Nina Treitler, Eva Grasmann, Camilla Götz, and Betty Schrenk, as well as Slaven Crnkovic,  
590 Mathias Hochgerner, Chandran Nagaraj and Horst Olschewski for the valuable discussions and advice.  
591 Diana Schnögl, Francesco Valzano and Neha Sharma are members of the MolMed graduate  
592 programme. Diana Schnögl is funded by FFG, project number 870904 awarded to Leigh Marsh.  
593 Francesco Valzano is funded by FFG, project number 874229 awarded to Grazyna Kwapiszewska.  
594 Valentina Biasin is funded by Austrian Science Fund (FWF; project number, T1032-B34).

595 **Competing interests**

596 The authors declare that they have no competing interests.

597 **Data and materials availability**

598 All data needed to evaluate the conclusions in the paper are present in the paper or the Supplementary  
599 Materials.

600

601

## 602 **References**

- 603 Aran D, Looney AP, Liu L, Wu E, Fong V, Hsu A, Chak S, Naikawadi RP, Wolters PJ, Abate AR,  
604 Butte AJ, Bhattacharya M. 2019. Reference-based analysis of lung single-cell sequencing reveals  
605 a transitional profibrotic macrophage. *Nat Immunol* **20**:163–172. doi:10.1038/s41590-018-0276-  
606 y
- 607 B Moore B, Lawson WE, Oury TD, Sisson TH, Raghavendran K, Hogaboam CM. 2013. Animal models  
608 of fibrotic lung disease. *Am J Respir Cell Mol Biol* **49**:167–79. doi:10.1165/rcmb.2013-0094TR
- 609 Balestro E, Calabrese F, Turato G, Lunardi F, Bazzan E, Marulli G, Biondini D, Rossi E, Sanduzzi A,  
610 Rea F, Rigobello C, Gregori D, Baraldo S, Spagnolo P, Cosio MG, Saetta M. 2016. Immune  
611 Inflammation and Disease Progression in Idiopathic Pulmonary Fibrosis. *PLoS One* **11**:e0154516.  
612 doi:10.1371/journal.pone.0154516
- 613 Biasin V, Crnkovic S, Sahu-Osen A, Birnhuber A, El Agha E, Sinn K, Klepetko W, Olschewski A,  
614 Bellusci S, Marsh LM, Kwapiszewska G. 2020. PDGFR $\alpha$  and  $\alpha$ SMA mark two distinct  
615 mesenchymal cell populations involved in parenchymal and vascular remodeling in pulmonary  
616 fibrosis. *Am J Physiol Cell Mol Physiol* ajplung.00128.2019. doi:10.1152/ajplung.00128.2019
- 617 Biasin V, Wygrecka M, Marsh LM, Becker-Pauly C, Brcic L, Ghanim B, Klepetko W, Olschewski A,  
618 Kwapiszewska G. 2017. Meprin  $\beta$  contributes to collagen deposition in lung fibrosis. *Sci Rep*  
619 **7**:39969. doi:10.1038/srep39969
- 620 Cui H, Jiang D, Banerjee S, Xie N, Kulkarni T, Liu R-M, Duncan SR, Liu G. 2020. Monocyte-derived  
621 alveolar macrophage Apolipoprotein E participates in pulmonary fibrosis resolution. *JCI Insight*.  
622 doi:10.1172/jci.insight.134539
- 623 Della Latta V, Cecchetti A, Del Ry S, Morales MA. 2015. Bleomycin in the setting of lung fibrosis  
624 induction: From biological mechanisms to counteractions. *Pharmacol Res* **97**:122–130.  
625 doi:10.1016/j.phrs.2015.04.012
- 626 El Agha E, Kramann R, Schneider RK, Li X, Seeger W, Humphreys BD, Bellusci S. 2017.  
627 Mesenchymal Stem Cells in Fibrotic Disease. *Cell Stem Cell*. doi:10.1016/j.stem.2017.07.011
- 628 Engblom C, Pflirschke C, Zilionis R, Da Silva Martins J, Bos SA, Courties G, Rickelt S, Severe N,  
629 Baryawno N, Faget J, Savova V, Zemmour D, Kline J, Siwicki M, Garris C, Pucci F, Liao HW,  
630 Lin YJ, Newton A, Yaghi OK, Iwamoto Y, Tricot B, Wojtkiewicz GR, Nahrendorf M, Cortez-  
631 Retamozo V, Meylan E, Hynes RO, Demay M, Klein A, Bredella MA, Scadden DT, Weissleder  
632 R, Pittet MJ. 2017. Osteoblasts remotely supply lung tumors with cancer-promoting SiglecFhigh  
633 neutrophils. *Science (80- )* **358**. doi:10.1126/science.aal5081
- 634 Gungl A, Biasin V, Wilhelm J, Olschewski A, Kwapiszewska G, Marsh LM. 2018. Fra2  
635 Overexpression in Mice Leads to Non-allergic Asthma Development in an IL-13 Dependent  
636 Manner. *Front Immunol* **9**:2018. doi:10.3389/fimmu.2018.02018
- 637 Hubert M, Rousseeuw PJ, Van den Bossche W. 2019. MacroPCA: An All-in-One PCA Method

- 638       Allowing for Missing Values as Well as Cellwise and Rowwise Outliers. *Technometrics* 1–18.  
639       doi:10.1080/00401706.2018.1562989
- 640 Izbicki G, Segel MJ, Christensen TG, Conner MW, Breuer R. 2002. Time course of bleomycin-induced  
641 lung fibrosis. *Int J Exp Pathol* **83**:111–9. doi:10.1046/j.1365-2613.2002.00220.x
- 642 Joshi N, Watanabe S, Verma R, Jablonski RP, Chen CI, Cheres P, Markov NS, Reyfman PA,  
643 McQuattie-Pimentel AC, Sichizya L, Lu Z, Piseaux-Aillon R, Kirchenbuechler D, Flozak AS,  
644 Gottardi CJ, Cuda CM, Perlman H, Jain M, Kamp DW, Budinger GRS, Misharin A V. 2020. A  
645 spatially restricted fibrotic niche in pulmonary fibrosis is sustained by M-CSF/M-CSFR signalling  
646 in monocyte-derived alveolar macrophages. *Eur Respir J* **55**. doi:10.1183/13993003.00646-2019
- 647 Kahloon RA, Xue J, Bhargava A, Csizmadia E, Otterbein L, Kass DJ, Bon J, Soejima M, Levesque  
648 MC, Lindell KO, Gibson KF, Kaminski N, Banga G, Oddis C V., Pilewski JM, Sciruba FC,  
649 Donahoe M, Zhang Y, Duncan SR. 2013. Patients with Idiopathic Pulmonary Fibrosis with  
650 Antibodies to Heat Shock Protein 70 Have Poor Prognoses. *Am J Respir Crit Care Med* **187**:768–  
651 775. doi:10.1164/rccm.201203-0506OC
- 652 Kurosu K, Takiguchi Y, Okada O, Yumoto N, Sakao S, Tada Y, Kasahara Y, Tanabe N, Tatsumi K,  
653 Weiden M, Rom WN, Kuriyama T. 2008. Identification of Annexin 1 as a Novel Autoantigen in  
654 Acute Exacerbation of Idiopathic Pulmonary Fibrosis. *J Immunol* **181**:756–767.  
655 doi:10.4049/jimmunol.181.1.756
- 656 Kwapiszewska G, Gungl A, Wilhelm J, Marsh LM, Puthenparampil HT, Sinn K, Didiasova M,  
657 Klepetko W, Kosanovic D, Schermuly RT, Wujak L, Weiss B, Schaefer L, Schneider M, Kreuter  
658 M, Olschewski A, Seeger W, Olschewski H, Wygrecka M. 2018. Transcriptome profiling reveals  
659 the complexity of pirfenidone effects in idiopathic pulmonary fibrosis. *Eur Respir J* **52**.  
660 doi:10.1183/13993003.00564-2018
- 661 Maher TM, Strek ME. 2019. Antifibrotic therapy for idiopathic pulmonary fibrosis: time to treat. *Respir*  
662 *Res* **20**:205. doi:10.1186/s12931-019-1161-4
- 663 Marchal-Sommé J, Uzunhan Y, Marchand-Adam S, Valeyre D, Soumelis V, Crestani B, Soler P. 2006.  
664 Cutting Edge: Nonproliferating Mature Immune Cells Form a Novel Type of Organized  
665 Lymphoid Structure in Idiopathic Pulmonary Fibrosis. *J Immunol* **176**:5735–5739.  
666 doi:10.4049/jimmunol.176.10.5735
- 667 Marsh LM, Jandl K, Grünig G, Foris V, Bashir M, Ghanim B, Klepetko W, Olschewski H, Olschewski  
668 A, Kwapiszewska G. 2018. The inflammatory cell landscape in the lungs of patients with  
669 idiopathic pulmonary arterial hypertension. *Eur Respir J* **51**:1701214.  
670 doi:10.1183/13993003.01214-2017
- 671 Marshall DC, Saliccioli JD, Shea BS, Akuthota P. 2018. Trends in mortality from idiopathic  
672 pulmonary fibrosis in the European Union: an observational study of the WHO mortality database  
673 from 2001–2013. *Eur Respir J* **51**:1701603. doi:10.1183/13993003.01603-2017
- 674 McCubbrey AL, Barthel L, Mohning MP, Redente EF, Mould KJ, Thomas SM, Leach SM, Danhorn T,

- 675 Gibbings SL, Jakubzick C V., Henson PM, Janssen WJ. 2018. Deletion of c-FLIP from CD11b<sup>hi</sup>  
676 Macrophages Prevents Development of Bleomycin-induced Lung Fibrosis. *Am J Respir Cell Mol*  
677 *Biol* **58**:66–78. doi:10.1165/rcmb.2017-0154OC
- 678 Meltzer EB, Noble PW. 2008. Idiopathic pulmonary fibrosis. *Orphanet J Rare Dis* **3**:8.  
679 doi:10.1186/1750-1172-3-8
- 680 Misharin A V., Morales-Nebreda L, Mutlu GM, Budinger GRS, Perlman H. 2013. Flow Cytometric  
681 Analysis of Macrophages and Dendritic Cell Subsets in the Mouse Lung. *Am J Respir Cell Mol*  
682 *Biol* **49**:503–510. doi:10.1165/rcmb.2013-0086MA
- 683 Misharin A V., Morales-Nebreda L, Reyfman PA, Cuda CM, Walter JM, McQuattie-Pimentel AC,  
684 Chen C-I, Anekalla KR, Joshi N, Williams KJN, Abdala-Valencia H, Yacoub TJ, Chi M, Chiu S,  
685 Gonzalez-Gonzalez FJ, Gates K, Lam AP, Nicholson TT, Homan PJ, Soberanes S, Dominguez S,  
686 Morgan VK, Saber R, Shaffer A, Hinchcliff M, Marshall SA, Bharat A, Berdnikovs S, Bhorade  
687 SM, Bartom ET, Morimoto RI, Balch WE, Sznajder JI, Chandel NS, Mutlu GM, Jain M, Gottardi  
688 CJ, Singer BD, Ridge KM, Bagheri N, Shilatifard A, Budinger GRS, Perlman H. 2017. Monocyte-  
689 derived alveolar macrophages drive lung fibrosis and persist in the lung over the life span. *J Exp*  
690 *Med* **214**:2387–2404. doi:10.1084/jem.20162152
- 691 Nagaraj C, Haitchi HM, Heinemann A, Howarth PH, Olschewski A, Marsh LM. 2017. Increased  
692 Expression of p22phox Mediates Airway Hyperresponsiveness in an Experimental Model of  
693 Asthma. *Antioxid Redox Signal* **27**:1460–1472. doi:10.1089/ars.2016.6863
- 694 Ogushi F, Tani K, Endo T, Tada H, Kawano T, Asano T, Huang L, Ohmoto Y, Muraguchi M, Moriguchi  
695 H, Sone S. 2001. Autoantibodies to IL-1 alpha in sera from rapidly progressive idiopathic  
696 pulmonary fibrosis. *J Med Invest* **48**:181–9.
- 697 Peng R, Sridhar S, Tyagi G, Phillips JE, Garrido R, Harris P, Burns L, Renteria L, Woods J, Chen L,  
698 Allard J, Ravindran P, Bitter H, Liang Z, Hogaboam CM, Kitson C, Budd DC, Fine JS, Bauer  
699 CMT, Stevenson CS. 2013. Bleomycin Induces Molecular Changes Directly Relevant to  
700 Idiopathic Pulmonary Fibrosis: A Model for “Active” Disease. *PLoS One* **8**:e59348.  
701 doi:10.1371/journal.pone.0059348
- 702 R Core Team. 2020. R: A language and environment for statistical computing. R Foundation for  
703 Statistical Computing.
- 704 Reyfman PA, Walter JM, Joshi N, Anekalla KR, McQuattie-Pimentel AC, Chiu S, Fernandez R,  
705 Akbarpour M, Chen C-I, Ren Z, Verma R, Abdala-Valencia H, Nam K, Chi M, Han S, Gonzalez-  
706 Gonzalez FJ, Soberanes S, Watanabe S, Williams KJN, Flozak AS, Nicholson TT, Morgan VK,  
707 Winter DR, Hinchcliff M, Hrusch CL, Guzy RD, Bonham CA, Sperling AI, Bag R, Hamanaka  
708 RB, Mutlu GM, Yeldandi A V., Marshall SA, Shilatifard A, Amaral LAN, Perlman H, Sznajder  
709 JI, Argento AC, Gillespie CT, Dematte J, Jain M, Singer BD, Ridge KM, Lam AP, Bharat A,  
710 Bhorade SM, Gottardi CJ, Budinger GRS, Misharin A V. 2019. Single-Cell Transcriptomic  
711 Analysis of Human Lung Provides Insights into the Pathobiology of Pulmonary Fibrosis. *Am J*

- 712           *Respir Crit Care Med* **199**:1517–1536. doi:10.1164/rccm.201712-2410OC
- 713 Rousseeuw PJ, Hubert M. 2018. Anomaly detection by robust statistics. *Wiley Interdiscip Rev Data*
- 714           *Min Knowl Discov* **8**:e1236. doi:10.1002/widm.1236
- 715 Saeys Y, Van Gassen S, Lambrecht BN. 2016. Computational flow cytometry: helping to make sense
- 716           of high-dimensional immunology data. *Nat Rev Immunol* **16**:449–462. doi:10.1038/nri.2016.56
- 717 Selman M, King TE, Pardo A. 2001. Idiopathic Pulmonary Fibrosis: Prevailing and Evolving
- 718           Hypotheses about Its Pathogenesis and Implications for Therapy. *Ann Intern Med* **134**:136.
- 719           doi:10.7326/0003-4819-134-2-200101160-00015
- 720 Selman M, Pardo A. 2002. Idiopathic pulmonary fibrosis: an epithelial/fibroblastic cross-talk disorder.
- 721           *Respir Res* **3**:3. doi:10.1186/RR175
- 722 Taillé C, Grootenboer-Mignot S, Boursier C, Michel L, Debray M-P, Fagart J, Barrientos L, Mailleux
- 723           A, Cigna N, Tubach F, Marchal-Sommé J, Soler P, Chollet-Martin S, Crestani B. 2011.
- 724           Identification of Periplakin as a New Target for Autoreactivity in Idiopathic Pulmonary Fibrosis.
- 725           *Am J Respir Crit Care Med* **183**:759–766. doi:10.1164/rccm.201001-0076OC
- 726 Tashiro J, Rubio GA, Limper AH, Williams K, Elliot SJ, Ninou I, Aidinis V, Tzouveleakis A, Glassberg
- 727           MK. 2017. Exploring animal models that resemble idiopathic pulmonary fibrosis. *Front Med.*
- 728           doi:10.3389/fmed.2017.00118
- 729 Tighe RM, Misharin A V., Jakubzick C V., Brinkman R, Curtis JL, Duggan R, Freeman CM, Herold
- 730           S, Janssen W, Nakano H, Redente EF, Singer BD, Sperling AI, Swaminathan S, Yu YR, Zacharias
- 731           WJ. 2019a. Improving the quality and reproducibility of flow cytometry in the lung. *Am J Respir*
- 732           *Cell Mol Biol* **61**:150–161. doi:10.1165/rcmb.2019-0191ST
- 733 Tighe RM, Misharin A V., Jakubzick C V., Brinkman R, Curtis JL, Duggan R, Freeman CM, Herold
- 734           S, Janssen W, Nakano H, Redente EF, Singer BD, Sperling AI, Swaminathan S, Yu YR, Zacharias
- 735           WJ. 2019b. Improving the quality and reproducibility of flow cytometry in the lung. *Am J Respir*
- 736           *Cell Mol Biol* **61**:150–161. doi:10.1165/rcmb.2019-0191ST
- 737 Todd NW, Scheraga RG, Galvin JR, Iacono AT, Britt EJ, Luzina IG, Burke AP, Atamas SP. 2013.
- 738           Lymphocyte aggregates persist and accumulate in the lungs of patients with idiopathic pulmonary
- 739           fibrosis. *J Inflamm Res* **6**:63–70. doi:10.2147/JIR.S40673
- 740 Wuyts WA, Agostini C, Antoniou KM, Bouros D, Chambers RC, Cottin V, Egan JJ, Lambrecht BN,
- 741           Lories R, Parfrey H, Prasse A, Robalo-Cordeiro C, Verbeke E, Verschakelen JA, Wells AU,
- 742           Verleden GM. 2013. The pathogenesis of pulmonary fibrosis: a moving target. *Eur Respir J*
- 743           **41**:1207–18. doi:10.1183/09031936.00073012
- 744 Xie T, Wang Y, Deng N, Huang G, Taghavifar F, Geng Y, Liu N, Kulur V, Yao C, Chen P, Liu Z,
- 745           Stripp B, Tang J, Liang J, Noble PW, Jiang D. 2018. Single-Cell Deconvolution of Fibroblast
- 746           Heterogeneity in Mouse Pulmonary Fibrosis. *Cell Rep* **22**:3625–3640.
- 747           doi:10.1016/j.celrep.2018.03.010

748 **Supplementary Figures and Tables**

**A**

| transformation | equation                                                                                                                                                                                                                                                   |
|----------------|------------------------------------------------------------------------------------------------------------------------------------------------------------------------------------------------------------------------------------------------------------|
| square root    | $\sqrt[2]{x}$                                                                                                                                                                                                                                              |
| reciprocal     | $\frac{1}{x}$                                                                                                                                                                                                                                              |
| Freeman Tukey  | $\sqrt[2]{x} + \sqrt[2]{x+1}$                                                                                                                                                                                                                              |
| logit          | $\ln\left(\frac{x_{map}}{(1-x_{map})}\right)$ with $x_{map} = \frac{(x-Y_{lwr}) \cdot ((upr-d) - (lwr-d))}{(Y_{upr}-Y_{lwr})} + d$<br>BALF $Y_{upr} = 30 \cdot 10^5$ , lung $Y_{upr} = 15 \cdot 10^4$ , $Y_{lwr} = 0$ , $upr = 1$ , $lwr = 0$ , $d = 0.25$ |
| LOG            | $\log_{10}(x)$                                                                                                                                                                                                                                             |
| LOGx+1         | $\log_{10}(x+1)$                                                                                                                                                                                                                                           |
| 4RT            | $\sqrt[4]{x}$                                                                                                                                                                                                                                              |

x – cell counts (BALF  $10^5$ , lung  $10^4$ /mg tissue)

**B**

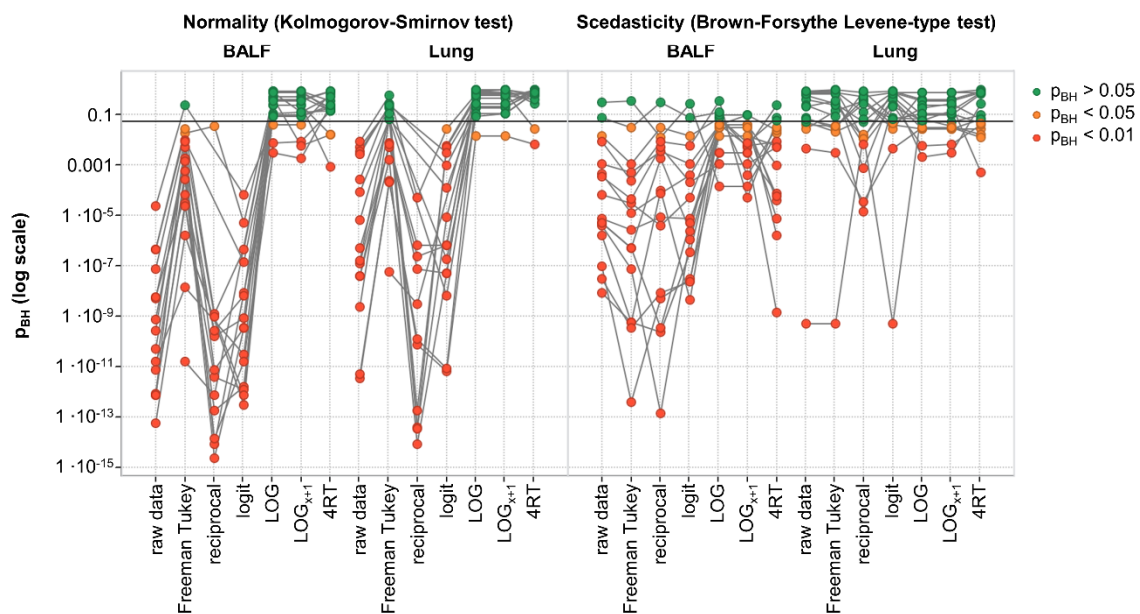

749

750 **Fig. S1.** Data transformations improve distribution and scedasticity. (A) List of tested data transformations with equations. (B)

751 Normality and scedasticity was tested for each of the 16 cell populations in either 159 BALF or 144 lung samples for

752 each of the transformations. The horizontal line denotes p<sub>BH</sub>= 0.05.

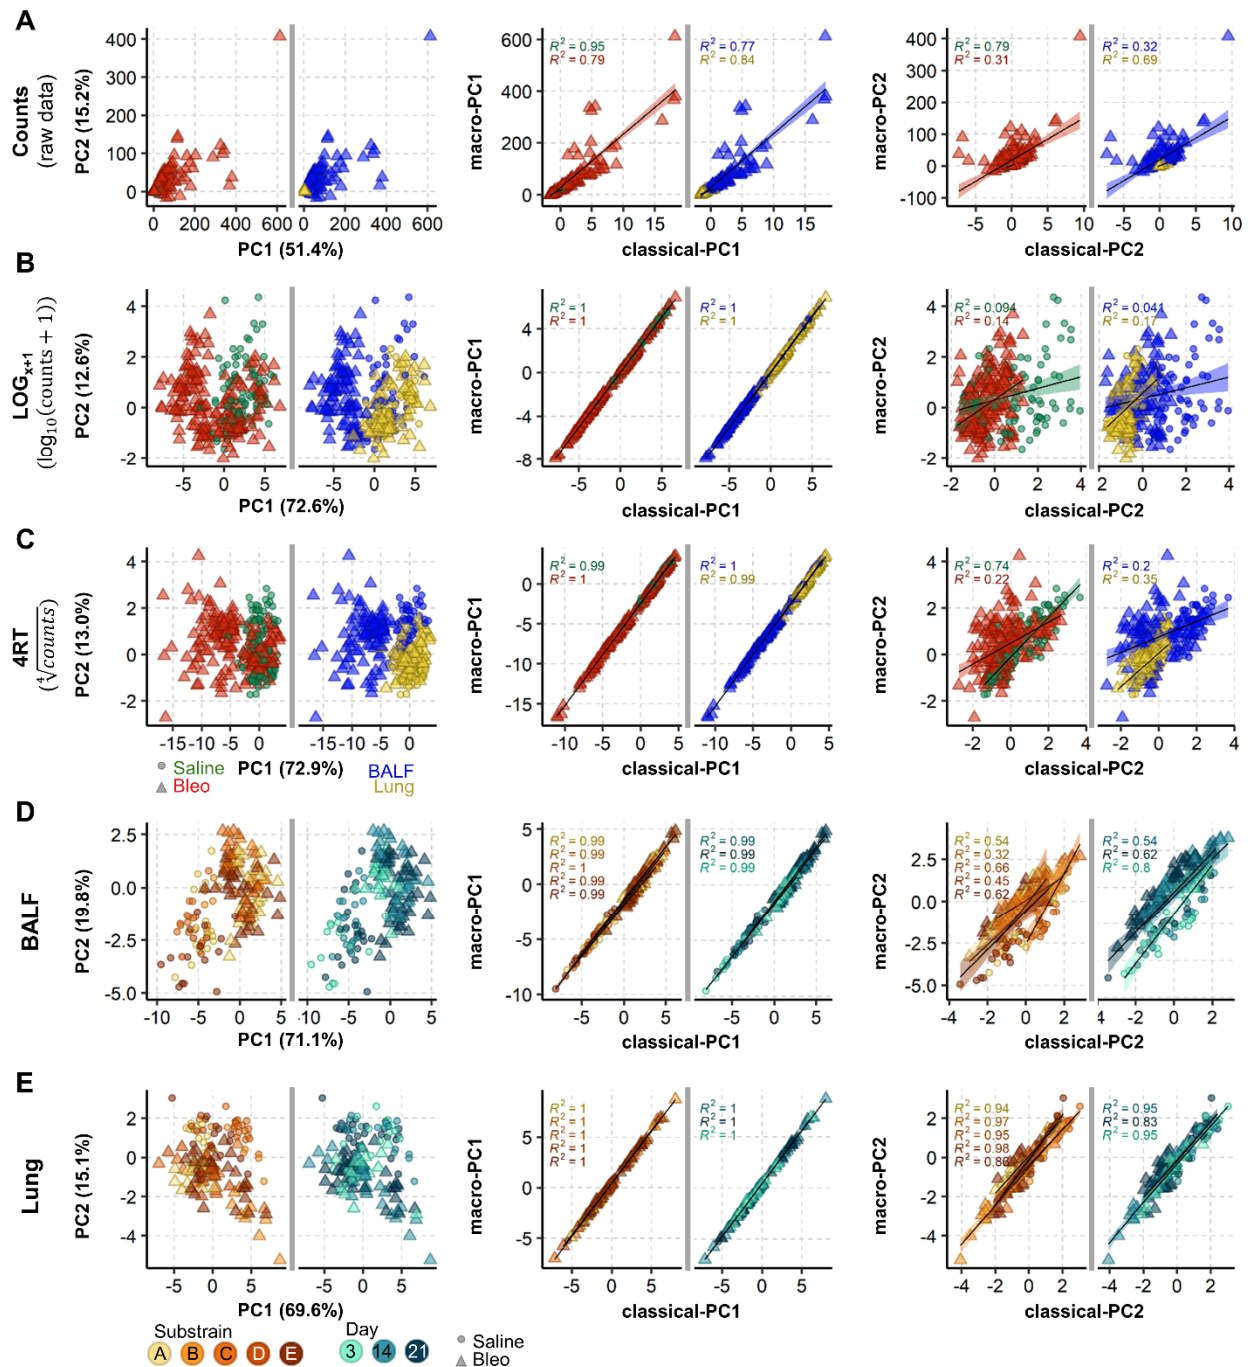

753  
754  
755  
756  
757  
758  
759  
760  
761

**Fig. S2.** MacroPCA and PCA deliver similar results. (A-C) MacroPCA scores plot of combined BALF (159 samples) and lung tissue (144 samples), before (untransformed, (A)) and after data transformation by  $\text{LOG}_{x+1}$  (B) or 4RT (fourth root; (C)). Samples are coloured to highlight effect of bleomycin (Saline or Bleo) and compartment (BALF or Lung). Middle and right panels show the linear fit of the first two principal components derived from the macroPCA and PCA results. (D-E) Separation of entire  $\text{LOG}_{x+1}$  transformed dataset into the tissue compartments, BALF (D) and lung (E). Middle and right panels show the linear fit of the first two principal components derived from the macroPCA and PCA results. Samples are coloured to highlight different days and substrains. Shapes are in all plots circles for saline and triangles for bleomycin.

762

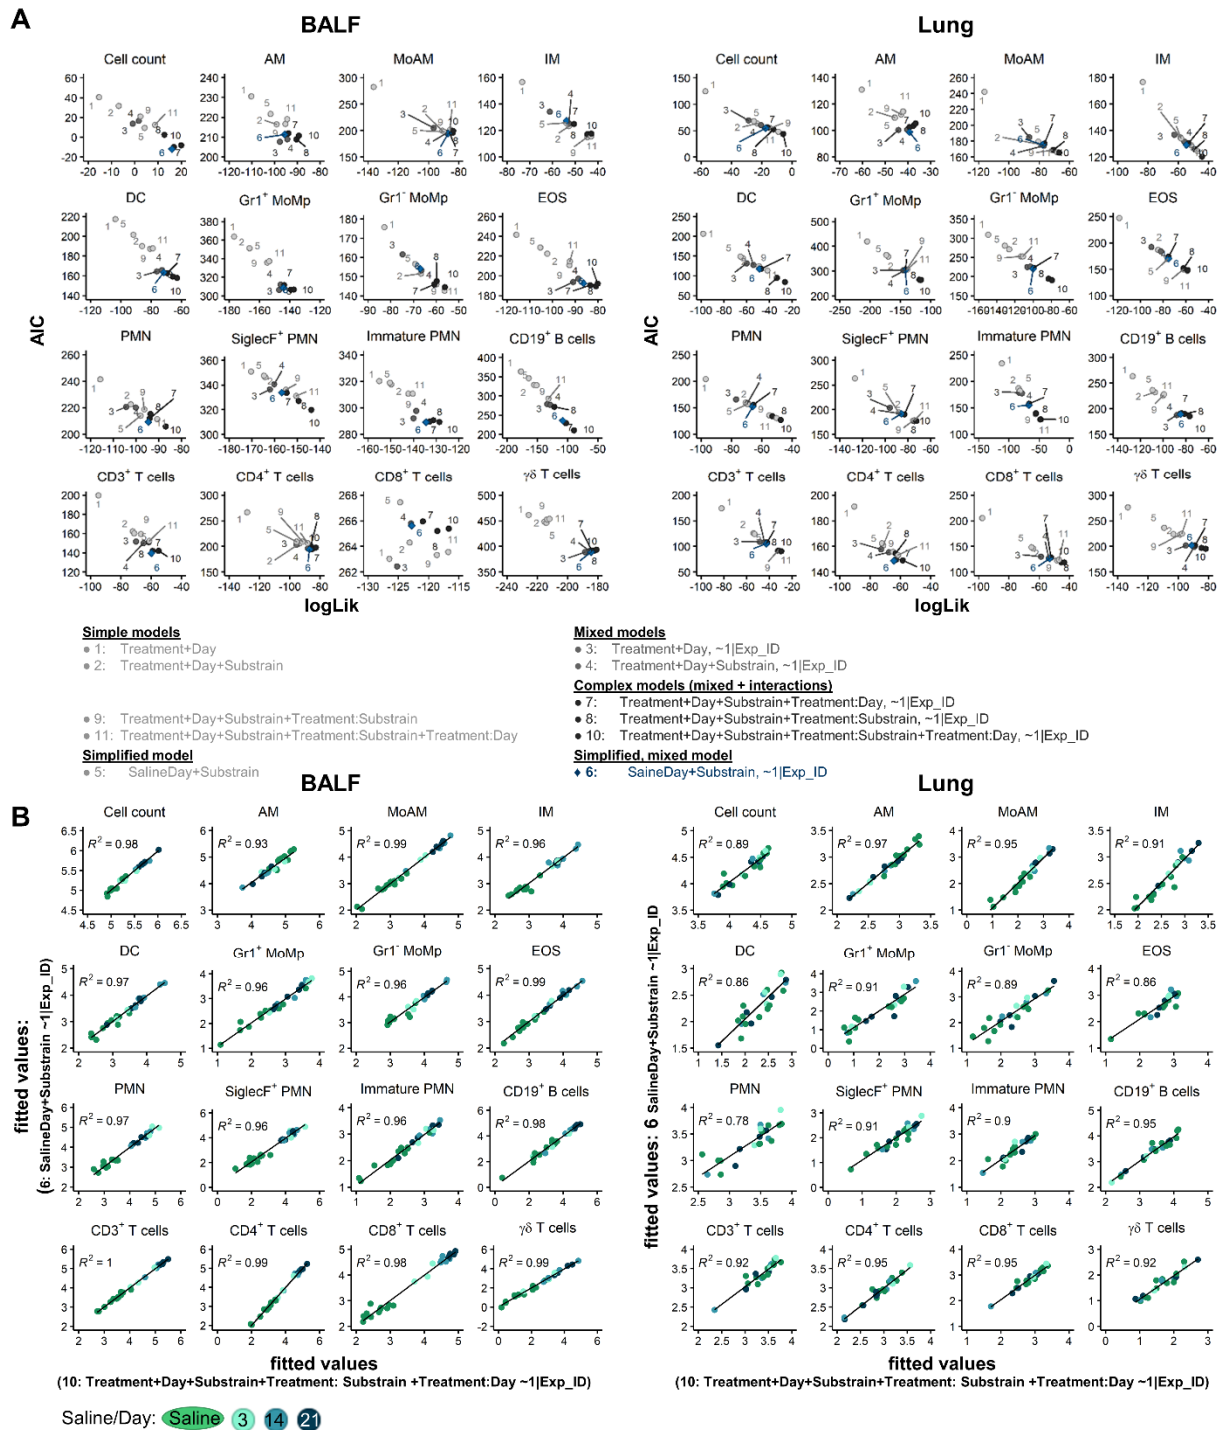

763

764

**Fig. S3.** Simplified mixed models exhibit best performance. Overview of ANOVA model performances for model selection by: (A) Comparison of model performance by AIC and logLik for all 16 cell populations in BALF and lung, better performance is indicated by lower relative estimate of information loss (AIC; Akaike information criterion) and higher goodness of fit (log-likelihood, logLik). (B) Direct comparison of fitted values (on LOG<sub>x+1</sub> scale) of the simplified mixed model versus the most complex mixed model. The Pearson correlation is shown as black line and R<sup>2</sup> is given.

765

766

767

768

769



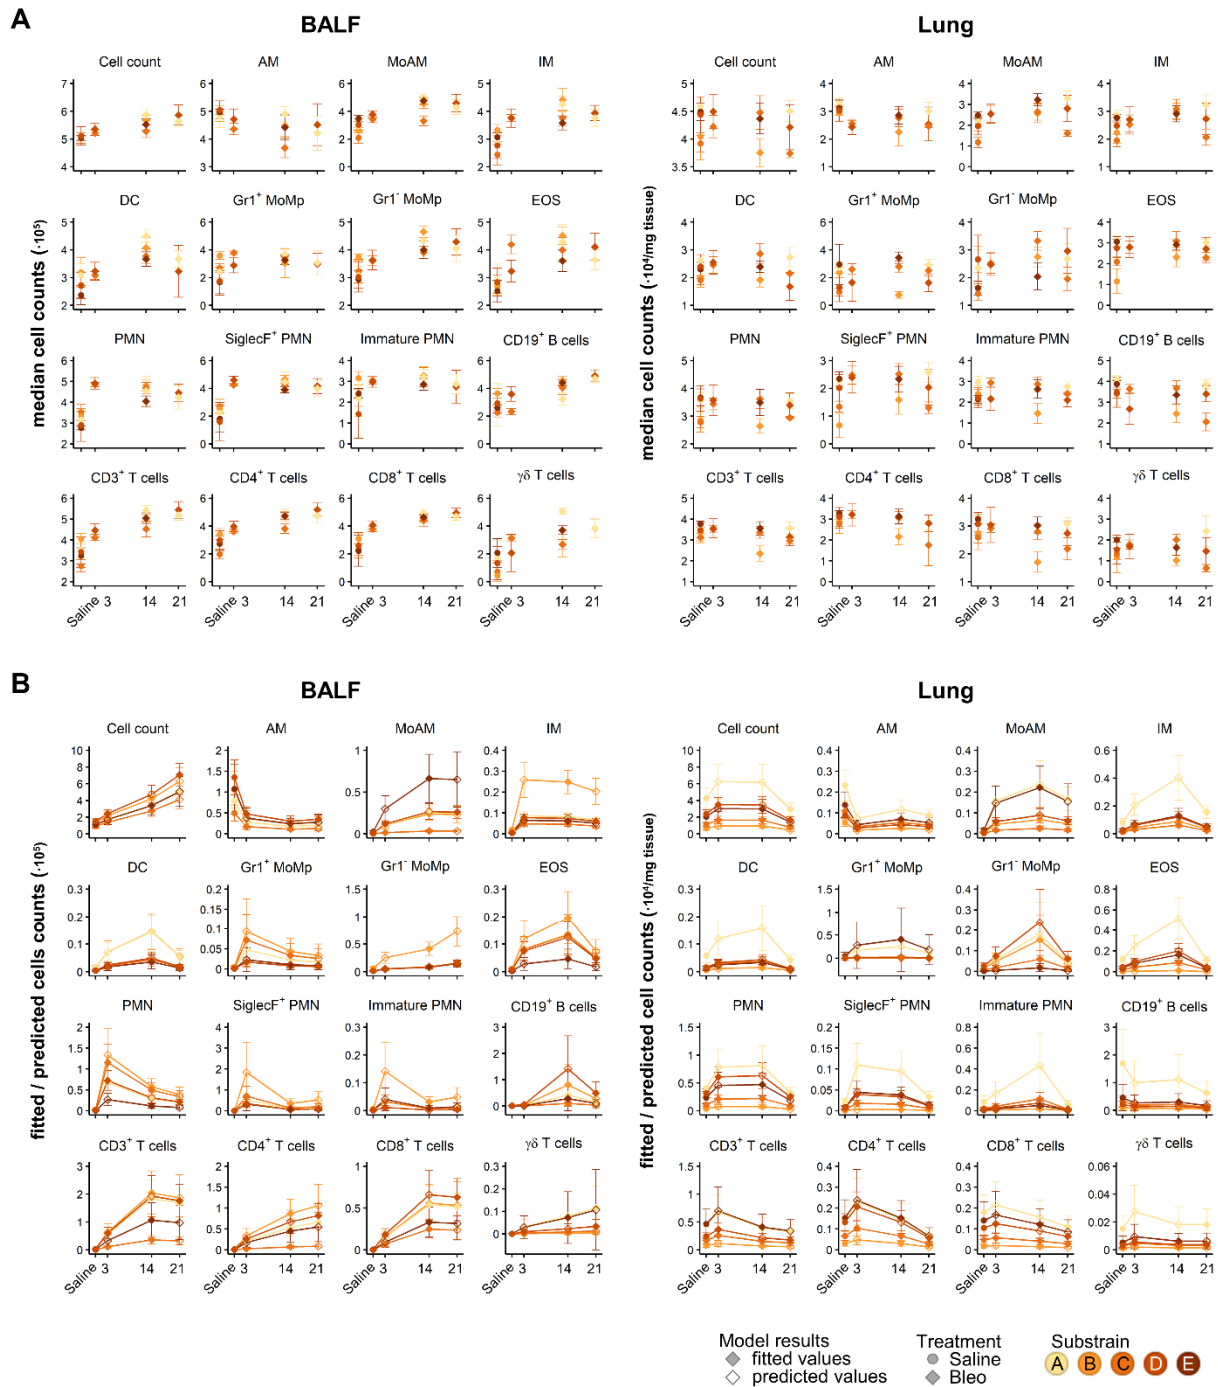

770  
 771  
 772  
 773  
 774  
 775  
 776  
 777  
 778

**Fig. S4.** Modelling of 16 cell populations in 159 BALF or 144 lung samples reveals complex cell kinetics. Overview of ANOVA model performances for model selection by: A) Comparison of model performance by AIC and logLik for all 16 cell populations in BALF and lung, better performance is indicated by lower relative estimate of information loss (AIC; Akaike information criterion) and higher goodness of fit (log-likelihood, logLik). B) Direct comparison of fitted values (on  $\text{LOG}_{x+1}$  scale) of the simplified mixed model versus the most complex mixed model. The Pearson correlation is shown as black line and  $R^2$  is given.

779 **Supplementary Table S1. Overview of group distribution.**

| Substrain | A                 |               | B                 |               | C             |               | D             |               | E             |               |
|-----------|-------------------|---------------|-------------------|---------------|---------------|---------------|---------------|---------------|---------------|---------------|
|           | BALF              | Lung          | BALF              | Lung          | BALF          | Lung          | BALF          | Lung          | BALF          | Lung          |
|           | Saline   Bleo     | Saline   Bleo | Saline   Bleo     | Saline   Bleo | Saline   Bleo | Saline   Bleo | Saline   Bleo | Saline   Bleo | Saline   Bleo | Saline   Bleo |
| Day 3     |                   |               |                   |               | 8 11          | 8 12          |               |               | 5 8<br>3 4    | 5 7<br>3 4    |
| Day 14    | 4 4               |               | 0 4<br>0 8<br>5 0 | 0 9<br>7 0    | 7 13          | 4 13          | 6 10          | 6 10          |               |               |
| Day 21    | 5 7<br>5 9<br>5 7 | 5 9<br>5 7    |                   |               |               | 6 3           |               |               | 3 6<br>4 8    | 3 6<br>4 8    |

780

781 **Supplementary Table S2. Antibodies, fluorophores and sources for flow cytometry.**

| Panel    | Antigen          | Label       | Company       | Catalogue  | Clone       | Isotype              | Identifier  | Dilution |
|----------|------------------|-------------|---------------|------------|-------------|----------------------|-------------|----------|
| Myeloid  | CD45             | FITC        | Thermo Fisher | 11-0451-82 | 30-F11      | Rat IgG2b, κ         | AB_2753206  | 1:200    |
|          | SiglecF          | PE          | BD Bioscience | 562757     | E50-2440    | Rat IgG2a, κ         | AB_2687994  | 1:20     |
|          | CD11c            | ef450       | Thermo Fisher | 48-0114-82 | N418        | Armenian hamster IgG | AB_1548654  | 1:50     |
|          | CD11b            | ef506       | Thermo Fisher | 69-0112-82 | M1/70       | Rat IgG2b, κ         | AB_2637406  | 1:50     |
|          | Gr-1 (Ly6G/Ly6C) | PE-Cy7      | Biologend     | 108402     | RB6-8C5     | Rat IgG2b, κ         | AB_313367   | 1:800    |
|          | CD64a/b          | AF647       | BD Bioscience | 558539     | X54-5/7.1   | Mouse NOD/Lt IgG1, κ | AB_647120   | 1:20     |
|          | CD24             | PerCP Cy5.5 | BD Bioscience | 562360     | M1/69       | Rat IgG2b, κ         | AB_11151895 | 1:500    |
|          | MHC-II           | APC-Cy7     | Biologend     | 107628     | M5/114.15.2 | Rat IgG2b, κ         | AB_2069377  | 1:400    |
| Lymphoid | CD45             | PerCP Cy5.5 | eBioscience   | 45-0451-82 | 30-F11      | Rat IgG2b, κ         | AB_1107002  | 1:200    |
|          | CD3              | AF700       | Thermo Fisher | 56-0033-82 | eBio500A2   | Syrian hamster / IgG | AB_837094   | 1:50     |
|          | CD19             | BB515       | BD Bioscience | 564531     | 1D3         | Rat IgG2a, κ         | AB_2738836  | 1:50     |
|          | CD8              | PE          | Biologend     | 100708     | 53-6.7      | Rat IgG2a, κ         | AB_312747   | 1:100    |
|          | CD4              | APC         | Biologend     | 17-0041-82 | GK1.5       | Rat IgG2b, κ         | AB_469320   | 1:100    |
|          | gdTCR            | ef450       | Thermo Fisher | 48-5711-82 | eBioGL3     | Armenian hamster IgG | AB_2574071  | 1:50     |

782

783 **Supplementary Table S3. Antibodies, fluorophores and sources for immunofluorescent staining.**

| Antigen    | Host   | Brand            | Catalogue  | Identifier | Concentration (µg/ml) |
|------------|--------|------------------|------------|------------|-----------------------|
| Collagen I | Goat   | Southern Biotech | 1310-01    | AB_2753206 | 0.8                   |
| CD4        | Rat    | Synaptic Systems | HS-360 017 | AB_2800530 | 10                    |
| CD11c      | Rabbit | Thermo Fisher    | PA5-79537  | AB_2746652 | 3.3                   |
| SiglecF    | Goat   | R&D Systems      | AF1706     | AB_354943  | 0.4                   |
| Ly6G       | Rat    | Biologend        | 127601     | AB_1089179 | 3.3                   |
| CD45       | Rabbit | Abcam            | AB10558    | AB_442810  | 0.6                   |

784

785

786 **Supplementary Table S4. Instrument configurations.**

| <b>Instrument</b> | <b>Laser lines</b> | <b>Bandpass Filters</b> |        |        |        |        |        |        |
|-------------------|--------------------|-------------------------|--------|--------|--------|--------|--------|--------|
| LSRII             | 488 nm             | 780/60                  | 695/40 | 670/14 | 610/20 | 576/26 | 530/30 | 488/10 |
|                   | 633 nm             | 780/60                  | 730/45 | 660/20 |        |        |        |        |
|                   | 405 nm             | 610/20                  | 525/50 | 440/40 |        |        |        |        |
|                   | 355 nm             | 530/30                  | 440/40 |        |        |        |        |        |
| Cytoflex S        | 488 nm             | 690/50                  | 525/40 | 488/8  |        |        |        |        |
|                   | 561 nm             | 780/60                  | 690/50 | 610/20 | 585/42 |        |        |        |
|                   | 633 nm             | 780/60                  | 712/25 | 660/20 |        |        |        |        |
|                   | 405 nm             | 660/20                  | 610/20 | 525/40 | 450/45 |        |        |        |

| <b>Instrument</b>       | <b>Parameter</b>                               | <b>Acquisition seq 1</b> | <b>Acquisition seq 2</b> |
|-------------------------|------------------------------------------------|--------------------------|--------------------------|
| Leica TCS-SP8           | Pinhole                                        | 67.9 $\mu\text{m}$       | 67.9 $\mu\text{m}$       |
|                         | PinholeAiry                                    | 1 AU                     | 1 AU                     |
|                         | EmissionWavelength for PinholeAiry Calculation | 580 nm                   | 580 nm                   |
|                         | Excitation Beam Splitter                       | TD 488/552/638           | TD 488/552/638           |
| Hybrid Detectors        | HyD 1 (nm)                                     |                          | 410 - 460                |
|                         | HyD 2 (nm)                                     | 492 - 522                | 560 - 571                |
|                         | HyD 3 (nm)                                     |                          | 613 - 630                |
|                         | HyD 4 (nm)                                     | 530 - 548                | 705 - 740                |
|                         | HyD 5 (nm)                                     | 645 - 675                |                          |
| Solid state lasers (nm) | 405, Intensity (%):                            | -                        | 0.30                     |
|                         | 488, Intensity (%):                            | 0.30                     | -                        |
|                         | 552, Intensity (%):                            | -                        | 0.40                     |
|                         | 638, Intensity (%):                            | 0.30                     | 0.04                     |

787
